1                   **Molecular basis for the R-type anion channel**  
2                                   **QUAC1 activity in guard cells**

3  
4  
5 Li Qin<sup>1,2#</sup>, Ling-hui Tang<sup>1,2#</sup>, Jia-shu Xu<sup>3,4#</sup>, Xian-hui Zhang<sup>1,2#</sup>, Yun Zhu<sup>3,4#</sup>, Chun-rui  
6 Zhang<sup>1,2</sup>, Xue-lei Liu<sup>1,2</sup>, Mei-hua Wang<sup>1,2</sup>, Fei Li<sup>5</sup>, Fei Sun<sup>3,4</sup>, Min Su<sup>1,2\*</sup>, Yu-jia Zhai<sup>3,4\*</sup> &  
7 Yu-hang Chen<sup>1,2\*</sup>

8  
9 <sup>1</sup> State Key Laboratory of Molecular Developmental Biology, Institute of Genetics and  
10 Developmental Biology, Chinese Academy of Sciences, Beijing, China; Innovative Academy  
11 of Seed Design, Chinese Academy of Sciences, Beijing 100101, China

12 <sup>2</sup> College of Advanced Agricultural Sciences, University of Chinese Academy of Sciences,  
13 Beijing 100049, China

14 <sup>3</sup> National Laboratory of Biomacromolecules, CAS Center for Excellence in  
15 Biomacromolecules, Institute of Biophysics, Chinese Academy of Sciences, Beijing 100101,  
16 China

17 <sup>4</sup> School of Life Sciences, University of Chinese Academy of Sciences, Beijing 100049, China

18 <sup>5</sup> Department of Biology, New York University, New York, NY 10003, USA

19 #These authors contributed equally to this work.

20  
21 \*Correspondence to:

22 Yu-hang Chen, E-mail: yuhang.chen@genetics.ac.cn; or

23 Yu-jia Zhai, E-mail: yujia@ibp.ac.cn; or

24 Min Su, E-mail: minsu@genetics.ac.cn.

25

26 **SUMMARY**

27 The rapid (R)-type anion channel plays a central role in controlling stomatal closure in plant  
28 guard cells, thus regulating the exchange of water and photosynthetic gas (CO<sub>2</sub>) in response to  
29 environmental stimuli. The activity of the R- type anion channel is regulated by malate.  
30 However, the molecular basis of the R-type anion channel activity remains elusive. Here, we  
31 describe the first cryo-EM structure of the R-type anion channel QUAC1 at 3.5 Å resolution in  
32 the presence of malate. The structure reveals that the QUAC1 is a symmetrical dimer, forming  
33 a single electropositive T-shaped pore for passing anions across the membrane. The  
34 transmembrane and cytoplasmic domains are assembled into a twisted bi-layer architecture,  
35 with the associated dimeric interfaces nearly perpendicular. Our structural and functional  
36 analyses reveal that QUAC1 functions as an inward rectifying anion channel and suggests a  
37 mechanism for malate-mediated channel activation. Altogether, our study uncovers the  
38 molecular basis for a novel class of anion channels and provides insights into the gating and  
39 modulation of the R-type anion channel.

40

41

42

43

44

45

46

47

48

49

50

51 **KEYWORDS**

52 Guard cell, QUAC1, Channel, Cryo-EM, Electrophysiology

53

## 54 INTRODUCTION

55 Stomatal pore, formed by a pair of guard cells in leaf epidermis, plays a crucial role in regulating  
56 CO<sub>2</sub> assimilation and water evaporation in plants<sup>1,2</sup>. Guard cells can integrate a wide range of  
57 environmental stimuli, such as drought, humidity, high CO<sub>2</sub>, and ozone, and convert them into  
58 appropriate turgor pressure changes that regulate stomatal opening or closure<sup>3,4</sup>.

59 It is well-established that anion effluxes are key events to initiate stomatal closure in  
60 response to environmental stimuli<sup>5-8</sup>. Previous studies showed that the guard cells harbour two  
61 distinct types of anion channels: rapid (R)-type and slow (S)-type<sup>9-12</sup>. The R-type anion channel  
62 can be fully activated and rapidly inactivated within milliseconds, whereas the S-type anion  
63 channel takes up to several tens of seconds to be activated, followed by slow inactivation  
64 kinetics<sup>10</sup>. Recent works of SLow Anion Channel 1 (SLAC1), an S-type anion channel  
65 discovered in *Arabidopsis*<sup>13-15</sup>, have uncovered detailed mechanisms underlying S-type anion  
66 channel activity<sup>16-21</sup>. However, the molecular basis of the biological role of the R-type anion  
67 channel is still largely enigmatic due to the lack of structural information.

68 QUick Anion Channel 1 (QUAC1), initially named aluminium-activated malate  
69 transporter12 (ALMT12), represents a guard cell R-type anion channel in *Arabidopsis*<sup>22</sup>. The  
70 loss-of-function of *quac1* (*almt12*) mutation resulted in impaired stomatal closure<sup>22,23</sup>. A  
71 double mutant lacking SLAC1 and QUAC1 was nearly unresponsive to various stimuli that  
72 were expected to cause stomatal closure<sup>24</sup>. Apart from its role in stomatal regulation, QUAC1  
73 also plays a vital role in cell polarity and the growth of pollen tubes via regulation of apical  
74 anion efflux<sup>25,26</sup>. The activity of QUAC1 was reported to be modulated by malate<sup>22,27-29</sup>, OST1  
75 phosphorylation<sup>30</sup> and calmodulin<sup>31</sup>, but the underlying mechanisms remain elusive.

76 Here, we report the first cryo-EM structure of soybean QUAC1 from *Glycine max*  
77 (*GmQUAC1*, ~67% sequence identity to *Arabidopsis AtQUAC1*) at the resolution of 3.5 Å in  
78 the presence of malate. The structure revealed that the QUAC1 is a symmetrical dimer  
79 assembled into twisted bi-layer architecture with a central T-shaped pore across the membrane.  
80 The pore is lined with highly conserved positively charged residues, rendering the pore surface  
81 electropositive, consistent with the QUAC1 function as an anion channel. Further

82 electrophysiological analyses reveal that the QUAC1 displays rapid kinetics in channel gating  
83 during activation and inactivation.

84 Our truncation study reveals that the N-terminal juxtamembrane helix is crucial in  
85 maintaining structural integrity for proper channel function. Further mutagenesis analyses  
86 demonstrate that the C-terminal interaction locks the channel in a high-energy state, and that a  
87 domain-swapped helix plays an inhibitory role in channel regulation. Two pore-lining W90  
88 residues, close to the lateral fenestration within the transmembrane domain, serve as toggle  
89 switches to regulate gating during channel activation. Therefore, the unique architecture  
90 endows QUAC1 function as an R-type anion channel, and our structural and functional analyses  
91 allow us to propose a novel mechanism for malate-mediated channel activation. Altogether, our  
92 study uncovers the molecular basis for a novel class of anion channels and provides insights  
93 into the gating and modulation of the R-type anion channel.

94

## 95 **RESULTS**

### 96 **Bioinformatics analyses of plant ALMTs/QUACs**

97 QUAC1 belongs to the ALMT family, which has diverse functions in plants, including stomatal  
98 function<sup>22,23,32-34</sup>, pollen tube growth<sup>25,26</sup>, Al<sup>3+</sup> resistance<sup>35-38</sup>, mineral nutrition<sup>39,40</sup>, fruit  
99 acidity<sup>41,42</sup>, microbe interactions<sup>43,44</sup>, and seed development<sup>45,46</sup>. There are thirteen members  
100 in the model plant *Arabidopsis thaliana*, except for one short sequence of a partial  
101 transmembrane domain (ALMT11). To better understand how QUAC (ALMT) proteins are  
102 represented in the plant kingdom, we clustered ~1,700 non-redundant sequences into a  
103 superfamily at the PSI-BLAST level  $E \leq 5 \times 10^{-3}$ , then into two distinct families at a threshold of  
104  $E \leq 10^{-160}$ , and finally into subfamilies at a threshold of  $E \leq 10^{-180}$ , as detailed in **Extended Data**  
105 **Table 1**.

106 Since more studies have shown that ALMT members function as anion channels rather  
107 than transporters, and the QUAC1 is now the best-characterized member, we adopted  
108 nomenclature for the QUAC superfamily, which was further divided into families QF1 and QF2.  
109 We further found that family QF1 has two subfamilies: QF1A comprises the *Arabidopsis*  
110 ALMT3, 4, 5, 6, 9 and their homologs, and QF1B has a distinct set of ALMT proteins. Family

111 QF2 has three subfamilies: the *Arabidopsis* ALMT1, 2, 7, 8, 10 proteins are in subfamily QF2A,  
112 the *Arabidopsis* ALMT12, 13, 14 proteins are in QF2B, and another distinct set of ALMT  
113 proteins are in QF2C (Extended Data Fig. 1).

114 The structure-based sequence alignment for the *GmQUAC1* and thirteen *Arabidopsis*  
115 QUAC/ALMTs is shown in Extended Data Fig. 2. Sequence analyses reveal that the ALMTs  
116 share relatively conserved transmembrane and cytosolic helical regions. Some conserved  
117 positively charged residues are distributed in the transmembrane regions and may be  
118 responsible for anion selectivity or voltage sensing. Some fingerprint motifs, including WEP  
119 (Trp-Glu-Pro) and PXWXG (Pro-X-Trp-X-Gly), are found in the cytosolic helical region. One  
120 of the most divergent regions (~50-100 aa in length) is found between H5 and H6 helices in the  
121 cytosolic portions, harbouring potential phosphorylation residues (Ser/Thr) for channel  
122 modulation. Further studies will provide mechanistic insight into the regulation of these  
123 characteristic motifs or distinct sets of QUACs.

124

#### 125 **Cryo-EM structural determination of QUAC1**

126 We screened six plant QUAC1s for expression and found that the *GmQUAC1* was suitable for  
127 further structural and functional studies (see method for details). Upon solubilization in 1.0%  
128 n-dodecyl- $\beta$ -D-maltopyranoside (DDM) and 0.02% cholesteryl hemisuccinate (CHS), the  
129 *GmQUAC1* proteins were purified by Ni<sup>2+</sup>-affinity chromatography, and the resulting peak-  
130 fractions were pooled and loaded onto a gel-filtration column for further purification, buffer  
131 and detergent exchange. The final solution contained 0.005% detergent LMNG, with either 150  
132 mM NaCl or 75 mM L-malate.

133 We further determined its cryo-EM structure in the presence of 75 mM L-malate  
134 (Extended Data Fig. 3, 4 and Extended Data Table 2). The dimeric reconstruction at 3.5 Å  
135 resolution allowed *de novo* modelling of 410 of the 537 amino acids (residues 36-393 and 455-  
136 506) per protomer chain. Other regions are not resolved in the density map due to their intrinsic  
137 flexibility in the protein. The search in the Dali server<sup>47</sup> for similar structures returned no  
138 significant hit. To the best of our knowledge, the QUAC1 protomer has a unique protein fold  
139 and architecture, representing a novel class of ion channels.

140

### 141 **The QUAC1 channel forms a twisted bi-layer architecture**

142 The QUAC1 channel is a flat vase-shaped homodimer with a two-fold axis perpendicular to the  
143 plasma membrane (Fig. 1a and Supplementary Video 1). The overall molecule forms a bi-layer  
144 architecture, divided into two portions of the transmembrane domain (TMD) and the  
145 cytoplasmic helical domain (CHD). The domain topology for each protomer is shown in Fig.  
146 1b. The TMD comprises 6 TM helices, arranging as three pairs of V-shaped helical hairpins  
147 stacked against each other, whereas the CHD has 7 helices, forming a helical bundle with a  
148 short domain-swapped finger helix. The N-terminal pre-TM region contains a juxtamembrane  
149 helix bent at a conserved proline before the TMD. A disorder region between helix H5 and H6  
150 in the CHD enriches with Ser/Thr residues (Extended Data Fig. 2), raising an intriguing  
151 possibility of containing phosphorylation sites for channel regulation.

152 The dimer formation is mediated by interactions from both TMDs and CHDs, which bury  
153 surface areas of  $\sim 3,500 \text{ \AA}^2$  and  $\sim 3,300 \text{ \AA}^2$ , respectively. When viewed from the extracellular  
154 side, the TM helices trace the circumference of an ellipse with TM1-TM6 from one protomer  
155 followed by another set of TM1-TM6 from the second protomer in an antiparallel manner (Fig.  
156 1c). At the membrane, TM1 and TM2 directly interact with TM4 and TM5 from another  
157 protomer, respectively. In the cytoplasm, the CHD of each protomer unites together at the distal  
158 end of the molecule, mediated by intensive interactions. A domain-swapped finger helix (H6)  
159 also participates in C-terminal interactions (Fig. 1d). However, the functional role of these  
160 interactions remains unclear.

161 In the bi-layer structure of QUAC1, the TMDs connect to the CHDs via a highly conserved  
162 PXWXG motif (Pro-X-Trp-X-Gly). They interact with each other in a twisted manner, with  
163 their dimeric interfaces nearly perpendicular to each other (forming a dihedral angle of  $\sim 83^\circ$ )  
164 (Fig. 2a). Interestingly, another characteristic motif WEP (Trp-Glu-Pro), located in the  
165 connecting loop between helix H2 and H3, is found in the vicinity of the PXWXG motif at the  
166 layer interface between TMD and CHD. These two motifs, together with other surrounding  
167 charged residues (Arg/Lys: R56, K63, R291, and R294; Asp/Glu: D54, E223, D224, and E289),

168 form intensive interactions at the layer interface, and thus may play a vital role in coupling  
169 channel regulation to gating (Fig. 2b). Mutations in the WEP motif (E286Q in *TaALMT1* and  
170 E276Q in *AtQUAC1*)<sup>27,48</sup> completely abolish their channel activities, possibly due to impaired  
171 coupling between the TMD and CHD caused by the altered interaction at the layer interface.  
172 Thus, the unique architecture design causes the channel in a high-energy state, providing a  
173 structural basis for QUAC1 function as an R-type channel. These observations also imply that  
174 the intramolecular domain rearrangements may occur upon channel activation.

175

### 176 **Structural features of the ion conduction pathway in QUAC1**

177 Unlike the trimeric SLAC1, which has three independent pores<sup>20</sup>, the dimeric QUAC1 forms  
178 a single T-shaped tunnel with a bifurcated entrance in the cytoplasm (Fig. 3a). The TM2, TM3,  
179 TM5, and TM6 from both protomers create a pore with a radius of ~4-6 Å within the membrane  
180 (Fig. 3b), as estimated by HOLE<sup>49</sup>. Overall, the QUAC1 pore is lined with highly conserved  
181 and general hydrophobic residues (Fig. 3c). Nevertheless, some highly conserved positively  
182 charged residues are distributed along the pore, thus rendering the surface electropositive (Fig.  
183 3d).

184 Two arginines (R187 and R198) form a positively charged ring facing the pore entrance  
185 at the extracellular side. Three positively charged residues from TM3 and TM4 (K109, R113,  
186 and R158) protrude into the pore, making a second positively charged ring within the membrane.  
187 They are associated with other conserved residues from TM2 and TM5 (E100, D168, and Y169),  
188 mediating an inter-helices network within the pore. Another two lysines (K164 and K165) form  
189 additional constrictions at the bottom of the T-shaped pore (Fig. 3e). Altogether, the structural  
190 feature of QUAC1 likely contributes to its function as an anion-conducting channel. The above  
191 findings suggest that permeable anions interact with the pore-lining charged residues, thus  
192 participating in channel regulation.

193 Remarkably, a central kink (~24°) in TM6 causes a lateral fenestration from the membrane  
194 to the lumen of the channel pore within each protomer (Fig. 4a). The fenestration measures ~6  
195 Å × 20 Å, and its dimension depends upon the conformation of pore-forming TMs, especially

196 the kinked TM6. The presence of kinked helix and lateral fenestration in the structure implies  
197 that the channel in 75 mM malate is in a constrained conformation. Interestingly, several  
198 unmodeled densities and a highly conserved pore-lining W90 residue are found within or near  
199 the fenestration (Fig. 4b), raising an interesting question if the bulky W90 residue serves as a  
200 toggle switch to regulate channel gating during QUAC1 activation.

201

## 202 **Functional characterization of QUAC1 by TEVC**

203 A total of 34 ALMTs were found in soybean<sup>50</sup>, but none of them has yet been functionally  
204 characterized by electrophysiology. We expressed the *GmQUAC1*/ALMT12 in *Xenopus laevis*  
205 oocytes and measured channel conductance by applying the two-electrode voltage-clamp  
206 (TEVC) technique. In the recordings, the application of voltage pulses elicited rapidly  
207 activating currents in the bath solution of malate, resembling the *AtQUAC1*<sup>22</sup>. We also found  
208 that the steady-state currents mediated by *GmQUAC1* displayed a bell-shaped current-voltage  
209 curve (Extended Data Fig. 5). This electrophysiological behaviour points to a strong voltage  
210 dependence for the QUAC1 channel activation, a hallmark feature of the R-type anion channel  
211 in guard cells<sup>10,22</sup>.

212 We also measured the conductance of *GmQUAC1* in other bath solutions. Surprisingly,  
213 we found that the activation/inactivation kinetics and voltage-dependency of *GmQUAC1* in  
214 NaNO<sub>3</sub> or NaCl solutions are distinguished from those in malate solution (Extended Data Fig.  
215 5). In contrast to substantial instantaneous currents, only small steady-state currents can be seen  
216 in the recording of *GmQUAC1* in the bath solution of NaNO<sub>3</sub> or NaCl (Extended Data Fig. 5).  
217 Overall, our TEVC recordings demonstrate that external anions play a crucial role in regulating  
218 QUAC1 channel properties, especially the activation/inactivation kinetics and steady-state  
219 currents. We hypothesize that the anions interplay with the pore-lining residues, such as the  
220 inter-helices charged residues interacting network within the pore (Fig. 3e), and act as door  
221 stopper wedges to regulate channel gating.

222

223



## 224 **Single-channel analysis of QUAC1 channel in planar lipid bilayer**

225 To further understand the single-channel properties, we first fused the *GmQUAC1*<sup>NaCl</sup> proteins  
226 (purified in 150 mM NaCl) into a lipid bilayer and measured channel conductance under  
227 different symmetrical solutions (Fig. 5a). When using symmetrical NaNO<sub>3</sub> solutions, the  
228 application of a series of transmembrane voltages to the *trans* chamber resulted in frequent  
229 openings and closings of the *GmQUAC1* channel, as evidenced by the current fluctuation in  
230 the recording traces at different applied voltages (Extended Data Fig. 6a). We also found that  
231 the channel gating transits between two predominant full open and closed states, and sometimes  
232 to a sub-conductance that is ~50% level of the full conductance (Fig. 5b). This observation is  
233 consistent with the two-entrance T-shaped tunnel presented in the QUAC1 channel (Fig. 3a).  
234 At ~50% of the full level, the intermediate sub-conductance suggested one of two entrances  
235 was blocked or closed. In addition, the QUAC1 channel gating displays a flickering feature that  
236 represents the rapid character of the activation/inactivation kinetics for R-type anion channels.

237 In contrast, we observed much reduced channel activity in the measurements in the  
238 solution of 150 mM NaCl (Extended Data Fig. 6b). The mean single-channel conductance for  
239 the *GmQUAC1*<sup>NaCl</sup> is  $75.5 \pm 4.5$  pS (n=5) and  $58.5 \pm 7.0$  pS (n=5) in the solutions of NaNO<sub>3</sub>  
240 and NaCl, respectively (Fig. 5c). Intriguingly, the channel open probability displays a strong  
241 voltage dependency, much higher at positive voltage than at negative one (Fig. 5d). As in our  
242 experimental setup, positive currents mean anions flow from the *cis* (representing cytoplasm)  
243 to the *trans*-chamber (representing extracellular side), and *vice versa*. Therefore, these results  
244 demonstrate that the QUAC1 channel functions as an R-type anion channel, favouring efflux  
245 (corresponding to anions flow from *cis*- to *trans*-chamber).

246

## 247 **Malate regulates QUAC1 channel gating.**

248 To investigate the effect of malate on the channel activity, we reproduced the same experiments  
249 with the *GmQUAC1*<sup>malate</sup> (purified in 75 mM L-malate) as above. Interestingly, we observed  
250 that *GmQUAC1*<sup>malate</sup> exhibits a similar current amplitude but a much higher open probability  
251 than those with *GmQUAC1*<sup>NaCl</sup> in both solutions of NaNO<sub>3</sub> and NaCl (Fig. 5c and Extended

252 **Data Fig. 6**). The mean single-channel conductance for the  $GmQUAC1^{malate}$  is  $88.5 \pm 2.4$  pS  
253 ( $n=4$ ) and  $62.7 \pm 4.1$  pS ( $n=4$ ) in the solutions of  $NaNO_3$  and  $NaCl$ , respectively. The open  
254 probabilities of  $GmQUAC1^{malate}$  also display a similar voltage dependency as observed for  
255  $GmQUAC1^{NaCl}$  (Figure 5D and S6). Taken together, our results suggest that malate regulates  
256 QUAC1 activation by modulating channel opening probability.

257 To further examine malate regulation on the channel gating, 2 mM L-malate was added to  
258 the solutions upon the  $GmQUAC1^{NaCl}$  fused into a lipid bilayer. Interestingly, the channels  
259 became more active after adding 2 mM L-malate to either the *trans*- or *cis*-chamber (Fig. 6a  
260 and 6b). The current amplitude slightly increases, whereas the open probability becomes much  
261 higher (Fig. 6c and 6d). These observations confirm that malate can stimulate channel activity  
262 via enhanced open probability. Our findings also suggest that the malate regulation site may be  
263 located within the pore and can be accessed from either the extracellular or intracellular side of  
264 the membrane. We speculate that the  $GmQUAC1$  structure in the presence of 75 mM L-malate  
265 may represent an open state, although the malate-binding site remained unclear due to  
266 insufficient information.

267

### 268 **The N-terminal pre-TM helix is required for channel activity.**

269 The sequence analysis shows that the N-terminal segment before TMD is one of the most  
270 divergent regions in the QUAC family (Extended Data Fig. 2). The QUAC1 structure reveals  
271 that this region contains a juxtamembrane pre-TM helix (Fig. 1b), enriching positively charged  
272 residues. To examine its functional role, we designed a truncation construct ( $\Delta 1-53$ ).  
273 Surprisingly, we found that the  $\Delta 1-53$  mutant resulted in nearly null currents in the TEVC  
274 recordings (Extended Data Fig. 7). The observation demonstrates that the pre-TM helix is  
275 indispensable for channel activity. Considering its association with the inner leaflet of the  
276 membrane, we propose that the pre-TM helix may serve as a lever to regulate the proper  
277 conformation of the QUAC1 channel.

278

279

280 **The C-terminal dimeric interaction is crucial for channel function.**

281 The cytosolic C-terminal portion is mainly formed by  $\alpha$ -helices, except that a large divergent  
282 region between helix H5 and H6 is disordered or missing in the QUAC family (Extended Data  
283 Fig. 2). The *GmQUAC1* structure revealed extensive interactions between two CHDs at the  
284 distal end of the dimer (Fig. 7a). Two highly conserved hydrophobic residues (F470 and L474  
285 from helix H7) protrude into the hydrophobic pocket formed by another protomer. Together  
286 with their antiparallel counterparts from another protomer, these bulky hydrophobic residues  
287 form a zipper-like interaction at the dimeric interface (Fig. 7b). In addition, a short finger helix  
288 (H6), whose sequence is conserved in the subfamily QF2B (Extended Data Fig. 2), also  
289 participates in the dimeric interaction in a domain-swapped manner (Fig. 7c). These interactions  
290 unite the two CHDs together and thus creates an anchor point for mechanical force transduction  
291 between TMD and CHD.

292 To investigate the functional role of the dimeric interactions in channel regulation, we  
293 generated mutations, aiming to disrupt the dimer-interface (A477E and F470A/L474A), or to  
294 break the finger helix interaction in H6 ( $\Delta$ 460-467 and S461D), in both the CHD (residues 221-  
295 537) bacteria-expression constructs for gel-filtration analysis and the full-length oocyte-  
296 expression constructs for conductance measurement. In contrast to the wild type, both dimer-  
297 interface disrupting mutants exhibited backwards-shifted elution peaks (from 9.2 ml to 10.2 ml)  
298 in the gel filtration profile and showed almost null currents in TEVC recording. In another  
299 experiment, the two altered helix H6 mutants cause loosened dimers but unexpectedly enhanced  
300 channel activities (Fig. 7d-f and Extended Data Fig. 8). Altogether, our results show that the C-  
301 terminal interaction has two important functions: (1) joins the two CHD together and locks the  
302 channel in a high-energy state; (2) a domain-swapped helix (H6) plays an inhibitory role, and  
303 its release enhances the channel activity. Our results demonstrated that the C-terminal  
304 interaction provides a basis for fast regulation of the R-type anion channel.

305  
306

## 307 **Gating of the QUAC1 channel**

308 Our electrophysiological experiments have demonstrated that malate plays a vital role in  
309 modulating *Gm*QUAC1 activity; however, we wonder how malate regulation is coupled to  
310 channel activation. The *Gm*QUAC1 structure reveals that the conserved pore-lining tryptophan  
311 W90 is in close contact with an unmodelled density within the fenestration (Fig. 4b). To  
312 understand the functional role of W90, we made mutations of W90A and W90F. Compared to  
313 wild-type, the removal of indole ring in W90A mutant causes ~5 times larger conductance in  
314 the presence of external malate. A similar aromatic amino acid substitution in the W90F mutant  
315 can stimulate channel currents even larger (Extended Data Fig. 9a and 9b). These observations  
316 imply that the conserved W90 may interact with surrounding residues and function as a toggle  
317 switch to regulate channel gating.

318 This notion is confirmed in the measurement of combined mutants of W90F with other  
319 two loss-of-function mutants,  $\Delta$ 1-53 and A477E. We observed that both null mutants restore  
320 channel activity to a moderate level after the addition of W90F (Extended Data Fig. 9c and 9d).  
321 We speculate that malate promotes QUAC1 activation probably via regulating the  
322 conformation of tryptophan W90. Distinct from the S-type SLAC1 regulation controlled by  
323 phosphorylation/ dephosphorylation<sup>16-20</sup>, our study reveals that the R-type QUAC1 gating can  
324 be directly mediated by malate, which is much faster. These findings may explain the fast  
325 kinetics observed in the R-type channel, compared with the slow activity found in the S-type  
326 channel.

327

## 328 **DISCUSSION**

329 Recently, AlphaFold has made significant progress in 3D structure prediction from protein  
330 sequence<sup>51</sup>. By taking advantage of this advanced technology, we generated an AlphaFold  
331 predicted model for the *Gm*QUAC1 protein that is the focus of our current study. Surprisingly,  
332 the AlphaFold predicted *Gm*QUAC1 structure (AF-structure) is surprisingly similar to that  
333 determined by cryo-EM (cryo-EM structure), with an r.m.s.d. of 2.1 Å/160 C<sub>α</sub> and 1.4 Å/207  
334 C<sub>α</sub> for the TMD and CHD, respectively. However, further superimposition reveals a noticeable

335 difference in the orientation of TMD vs CHD in QUAC1, with an r.m.s.d. of 3.1 Å/388 C<sub>α</sub> and  
336 3.2 Å/776 C<sub>α</sub> for the monomer and dimer, respectively (Extended Data Fig. 10a).

337 Unlike the kinked TM6 observed in the cryo-EM structure, the TM6 in the AF-structure  
338 adopts a straight conformation, eliminating the lateral fenestration in TMD (Extended Data Fig.  
339 10b). As the malate regulation effect on the channel is not taken into account, the resulting  
340 predicted model may represent an apo-structure in a low energy state. The cryo-EM structure  
341 determined in the presence of malate reveals a high-energy twisted conformation, thus  
342 representing a malate-activated structure. These two structures allow us to make comparisons  
343 and gain insight into the gating mechanism of the QUAC1 channel. It seems that the pore-  
344 forming helices move slightly outward, as suggested by the porcupine plot on the C<sub>α</sub>  
345 comparison between the AF-structure and the cryo-EM structure (Extended Data Fig. 10c).  
346 Another noticeable difference is the dihedral angle between the TMD and CHD interfaces,  
347 which is 86.5° and 83.0° for the AF-structure and cryo-EM structure, respectively (Extended  
348 Data Fig. 10d). This observation shows a slight rotation (~3.5°) between these two states,  
349 suggesting that domain reorganization occurs during the conformational conversion. We  
350 speculate that the domain reorganization is associated with malate regulation, and subsequently  
351 triggers conformational changes of the toggle switch in the pore to activate the channel  
352 (Extended Data Fig. 10e and Supplementary Video 1).

353 Our work provides the first glimpse of the molecular structures of the R-type anion channel.  
354 Our study showed that the TMD and CHD portions in QUAC1 interact in a twisted manner,  
355 rendering the channel in a high-energy state. Based on our data, we propose the following  
356 mechanism for QUAC1 activation: upon malate binding, the QUAC1 undergoes intramolecular  
357 domain reorganization to form a twisted bi-layer architecture, which subsequently induces the  
358 conformational change of the toggle switch W90. These changes promote the channel  
359 conversion from the basal to the activated state. The malate-mediated activation is further  
360 enhanced by other modulations, such as kinase phosphorylation or calmodulin-binding,  
361 probably via releasing its inhibitory domain-swapped helix from the inter-protomer interaction  
362 (Fig. 7g and Supplementary Video 2). Our study provides mechanistic insights into the gating

363 activation of the R-type channel and offers a plausible explanation for fast kinetics in the R-  
364 type currents.

365 As both SLAC1 and QUAC1 represent two essential distinct channels that mediate  
366 osmotic active anions efflux from guard cell, one remaining puzzle is how they interplay with  
367 each other to initiate stomatal closure in response to various environmental stimuli. Further  
368 investigation to address this issue will shed light on the understanding of guard cell stomatal  
369 signaling and provide critical information for engineering drought-resistant or water-use  
370 efficiency crops.

371

372 **SUPPLEMENTAL INFORMATION**

373 Supplemental information can be found online at XXX

374

375 **ACKNOWLEDGMENTS**

376 We thank the staff at the Center for Biological Imaging (CBI), Institute of Biophysics, Chinese  
377 Academy of Sciences. This project is financially supported by the National Key Research and  
378 Development Program of China (2020YFA0509903 and 2016YFA0500503 to Y.-h.C., and  
379 2017YFA0504703 to Y.-j.Z.), the Strategic Priority Research Program of the Chinese Academy  
380 of Sciences (XDA24020305 to Y.-h.C., and XDB37040102 to F.S.), and the National Natural  
381 Science Foundation of China (31872721 to Y.-h.C., and 31771566 to Y.-j.Z.).

382

383 **DECLARATION OF INTERESTS**

384 The authors declare no competing financial interests.

385 **AUTHOR CONTRIBUTIONS**

386 L.Q. performed protein purification, Cryo-EM data collection, TEVC experiments, and data  
387 analysis; L.-h.T., J.-s.X., Y.Z. performed Cryo-EM data collection and structural determination;  
388 X.-h.Z. performed mutagenesis and protein purification; M.S. performed PLB experiments and  
389 data analysis; C.-r.Z., X.-l.L., M.-h.W, performed experiments; F.L., F.S., Y.-j.Z. analyzed data;  
390 Y.-h.C. initiated the project, planned and analyzed experiments, supervised the research and  
391 wrote the manuscript with input from all authors.

392

393 **REFERENCES**

- 394 1. Hetherington, A & Woodward, F. The role of stomata in sensing and driving environmental change.  
395 *Nature* **424**, 901–908 (2003).
- 396 2. Sirichandra, C., Wasilewska, A., Vlad, F., Valon, C. & Leung, J. The guard cell as a single-cell model  
397 towards understanding drought tolerance and abscisic acid action. *J. Exp. Bot.* **60**, 1439–1463 (2009).
- 398 3. Kim, T.-H., Böhmer, M., Hu, H., Nishimura, N. & Schroeder, J. I. Guard cell signal transduction network:  
399 advances in understanding abscisic acid, CO<sub>2</sub>, and Ca<sup>2+</sup> signaling. *Annu. Rev. Plant Biol.* **61**, 561–591  
400 (2010).

- 401 4. Murata, Y., Mori, I. C. & Munemasa, S. Diverse stomatal signaling and the signal integration mechanism.  
402 *Annu. Rev. Plant Biol.* **66**, 369–392 (2015).
- 403 5. Kollist, H., Nuhkat, M. & Roelfsema, M. R. G. Closing gaps: linking elements that control stomatal  
404 movement. *New Phytol.* **203**, 44–62 (2014).
- 405 6. Roelfsema, M. R. G., Hedrich, R. & Geiger, D. Anion channels: master switches of stress responses.  
406 *Trends Plant Sci.* **17**, 221–229 (2012).
- 407 7. Pantoja, O. Recent advances in the physiology of ion channels in plants. *Annu. Rev. Plant Biol.* **72**, 463-  
408 495 (2021).
- 409 8. Hedrich, R. Ion channels in plants. *Physiol. Rev.* **92**, 1777–1811 (2012).
- 410 9. Keller, B. U., Hedrich, R. & Raschke, K. Voltage-dependent anion channels in the plasma membrane of  
411 guard cells. *Nature* **341**, 450–453 (1989).
- 412 10. Schroeder, J. I. & Keller, B. U. Two types of anion channel currents in guard cells with distinct voltage  
413 regulation. *Proc. Natl. Acad. Sci. USA* **89**, 5025–5029 (1992).
- 414 11. Schroeder, J. I. *et al.* Cytosolic calcium regulates ion channels in the plasma membrane of *Vicia faba*  
415 guard cells. *Nature* **338**, 427–430 (1989).
- 416 12. Hedrich, R., Busch, H. & Raschke, K. Ca<sup>2+</sup> and nucleotide dependent regulation of voltage dependent  
417 anion channels in the plasma membrane of guard cells. *EMBO J.* **9**, 3889–3892 (1990).
- 418 13. Vahisalu, T. *et al.* SLAC1 is required for plant guard cell S-type anion channel function in stomatal  
419 signalling. *Nature* **452**, 487–491 (2008).
- 420 14. Negi, J. *et al.* CO<sub>2</sub> regulator SLAC1 and its homologues are essential for anion homeostasis in plant cells.  
421 *Nature* **452**, 483–486 (2008).
- 422 15. Saji, S. *et al.* Disruption of a gene encoding C4-dicarboxylate transporter-like protein increases ozone  
423 sensitivity through deregulation of the stomatal response in *Arabidopsis thaliana*. *Plant Cell Physiol.* **49**,  
424 2–10 (2008).
- 425 16. Geiger, D. *et al.* Activity of guard cell anion channel SLAC1 is controlled by drought-stress signaling  
426 kinase-phosphatase pair. *Proc. Natl. Acad. Sci. USA* **106**, 21425–21430 (2009).
- 427 17. Lee, S. C., Lan, W., Buchanan, B. B. & Luan, S. A protein kinase-phosphatase pair interacts with an ion  
428 channel to regulate ABA signaling in plant guard cells. *Proc. Natl. Acad. Sci. USA* **106**, 21419–21424



- 429 (2009).
- 430 18. Brandt, B. *et al.* Reconstitution of abscisic acid activation of SLAC1 anion channel by CPK6 and OST1  
431 kinases and branched ABI1 PP2C phosphatase action. *Proc. Natl. Acad. Sci. USA* **109**, 10593–10598  
432 (2012).
- 433 19. Maierhofer, T. *et al.* Site-and kinase-specific phosphorylation-mediated activation of SLAC1, a guard cell  
434 anion channel stimulated by abscisic acid. *Sci. Signal.* **7**, 1–12 (2014).
- 435 20. Deng, Y. N. *et al.* Structure and activity of SLAC1 channels for stomatal signaling in leaves. *Proc. Natl.*  
436 *Acad. Sci. USA* **118**, 1–8 (2021).
- 437 21. Chen, Y.-H. *et al.* Homologue structure of the SLAC1 anion channel for closing stomata in leaves. *Nature*  
438 **467**, 1074–1080 (2010).
- 439 22. Meyer, S. *et al.* AtALMT12 represents an R-type anion channel required for stomatal movement in  
440 Arabidopsis guard cells. *Plant J.* **63**, 1054–1062 (2010).
- 441 23. Sasaki, T. *et al.* Closing plant stomata requires a homolog of an aluminum-activated malate transporter.  
442 *Plant Cell Physiol.* **51**, 354–365 (2010).
- 443 24. Jalakas, P. *et al.* Combined action of guard cell plasma membrane rapid- and slow-type anion channels in  
444 stomatal regulation. *Plant Physiol.* (2021) doi:10.1093/plphys/kiab202.
- 445 25. Gutermuth, T. *et al.* Tip-localized Ca<sup>2+</sup>-permeable channels control pollen tube growth via kinase-  
446 dependent R- and S-type anion channel regulation. *New Phytol.* **218**, 1089-1105 (2018).
- 447 26. Herbell, S., Gutermuth, T. & Konrad, K. R. An interconnection between tip-focused Ca<sup>2+</sup> and anion  
448 homeostasis controls pollen tube growth. *Plant Signal. Behav.* **13**, 1559-2324 (2018).
- 449 27. Mumm, P. *et al.* C-terminus-mediated voltage gating of arabidopsis guard cell anion channel QUAC1.  
450 *Mol. Plant* **6**, 1550-1563 (2013).
- 451 28. Hedrich, R. *et al.* Malate-sensitive anion channels enable guard cells to sense changes in the ambient CO<sub>2</sub>  
452 concentration. *Plant J.* **6**, 741-748 (1994).
- 453 29. Raschke, K. Alternation of the slow with the quick anion conductance in whole guard cells effected by  
454 external malate. *Planta* **217**, 651-657 (2003).
- 455 30. Imes, D. *et al.* Open stomata 1 (OST1) kinase controls R-type anion channel QUAC1 in *Arabidopsis*  
456 guard cells. *Plant J.* **74**, 372–382 (2013).

- 457 31. Luu, K., Rajagopalan, N., Ching, J. C. H., Loewen, M. C. & Loewen, M. E. the malate-activated  
458 ALMT12 anion channel in the grass *Brachypodium distachyon* is co-activated by  $Ca^{2+}$ /calmodulin. *J.*  
459 *Biol. Chem.* **294**, 6142-6156 (2019).
- 460 32. Meyer, S. *et al.* Malate transport by the vacuolar *AtALMT6* channel in guard cells is subject to multiple  
461 regulation. *Plant J.* **67**, 247–257 (2011).
- 462 33. De Angeli, A., Zhang, J., Meyer, S. & Martinoia, E. *AtALMT9* is a malate-activated vacuolar chloride  
463 channel required for stomatal opening in *Arabidopsis*. *Nat. Commun.* **4**, 1–10 (2013).
- 464 34. Kovermann, P. *et al.* The *Arabidopsis* vacuolar malate channel is a member of the ALMT family. *Plant J.*  
465 **52**, 1169–1180 (2007).
- 466 35. Sasaki, T. *et al.* A wheat gene encoding an aluminum-activated malate transporter. *Plant J.* **37**, 645–653  
467 (2004).
- 468 36. Hoekenga, O. A. *et al.* *AtALMT1*, which encodes a malate transporter, is identified as one of several  
469 genes critical for aluminum tolerance in *Arabidopsis*. *Proc. Natl. Acad. Sci. USA* **103**, 9738–9743 (2006).
- 470 37. Collins, N. C., Shirley, N. J., Saeed, M., Pallotta, M. & Gustafson, J. P. An ALMT1 gene cluster  
471 controlling aluminum tolerance at the Alt4 Locus of Rye (*Secale cereale L.*). *Genetics* **179**, 669–682  
472 (2008).
- 473 38. Ligaba, A., Katsuhara, M., Ryan, P. R., Shibusaka, M. & Matsumoto, H. The *BnALMT1* and *BnALMT2*  
474 genes from rape encode aluminum-activated malate transporters that enhance the aluminum resistance of  
475 plant cells. *Plant Physiol.* **142**, 1294-1303 (2006).
- 476 39. Piñeros, M. A. *et al.* Not all ALMT1-type transporters mediate aluminum-activated organic acid  
477 responses: The case of *ZmALMT1* - An anion-selective transporter. *Plant J.* **53**, 352–367 (2008).
- 478 40. Ligaba, A., Maron, L., Shaff, J., Kochian, L. & Piñeros, M. Maize *ZmALMT2* is a root anion transporter  
479 that mediates constitutive root malate efflux. *Plant, Cell Environ.* **35**, 1185-1200 (2012).
- 480 41. Bai, Y. *et al.* A natural mutation-led truncation in one of the two aluminum-activated malate transporter-  
481 like genes at the Ma locus is associated with low fruit acidity in apple. *Mol. Genet. Genomics* **287**, 663–  
482 678. (2012).
- 483 42. De Angeli, A. *et al.* The vacuolar channel *VvALMT9* mediates malate and tartrate accumulation in berries  
484 of *Vitis vinifera*. *Planta* **238**, 283-291 (2013).

- 485 43. Rudrappa, T., Czymmek, K. J., Paré, P. W. & Bais, H. P. Root-secreted malic acid recruits beneficial soil  
486 bacteria. *Plant Physiol.* **148**, 1547-1556 (2008).
- 487 44. Takanashi, K. *et al.* A dicarboxylate transporter, *LjALMT4*, mainly expressed in nodules of lotus  
488 japonicus. *Mol. Plant-Microbe Interact.* **29**, 584–592 (2016).
- 489 45. Xu, M. *et al.* The barley anion channel, *HvALMT1*, has multiple roles in guard cell physiology and grain  
490 metabolism. *Physiol. Plant.* **153**, 183-193 (2015).
- 491 46. Heng, Y. *et al.* *OsALMT7* maintains panicle size and grain yield in rice by mediating malate transport.  
492 *Plant Cell* **30**, 889–906 (2018).
- 493 47. Holm, L. DALI and the persistence of protein shape. *Protein Sci.* **29**, 128–140 (2020).
- 494 48. Furuichi, T. *et al.* An extracellular hydrophilic carboxy-terminal domain regulates the activity of  
495 *TaALMT1*, the aluminium-activated malate transport protein of wheat. *Plant J.* **64**, 47-55 (2010).
- 496 49. Smart, O. S., Neduveilil, J. G., Wang, X., Wallace, B. A. & Sansom, M. S. P. HOLE: A program for the  
497 analysis of the pore dimensions of ion channel structural models. *J. Mol. Graph.* **14**, 354–360 (1996).
- 498 50. Peng, W. *et al.* Characterization of the soybean *GmALMT* family genes and the function of *GmALMT5*  
499 in response to phosphate starvation. *J. Integr. Plant Biol.* **60**, 216–231 (2018).
- 500 51. Jumper, J. *et al.* Highly accurate protein structure prediction with AlphaFold. *Nature* (2021)  
501 doi:10.1038/s41586-021-03819-2.
- 502 52. Altschul, S. Gapped BLAST and PSI-BLAST: a new generation of protein database search programs.  
503 *Nucleic Acids Res.* **25**, 3389–3402 (1997).
- 504 53. Wang, X.-H. *et al.* Structural basis for the activity of TRIC counter-ion channels in calcium release. *Proc.*  
505 *Natl. Acad. Sci. USA* **116**, 4238–4243 (2019).
- 506 54. Mastronarde, D. N. Automated electron microscope tomography using robust prediction of specimen  
507 movements. *J. Struct. Biol.* **152**, 36-51. (2005).
- 508 55. Wu, C., Huang, X., Cheng, J., Zhu, D. & Zhang, X. High-quality, high-throughput cryo-electron  
509 microscopy data collection via beam tilt and astigmatism-free beam-image shift. *J. Struct. Biol.* **208**,  
510 107396 (2019).
- 511 56. Zivanov, J. *et al.* New tools for automated high-resolution cryo-EM structure determination in RELION-  
512 3. *Elife* **7**, 1–22 (2018).

- 513 57. Punjani, A., Rubinstein, J. L., Fleet, D. J. & Brubaker, M. A. cryoSPARC: algorithms for rapid  
514 unsupervised cryo-EM structure determination. *Nat. Methods* **14**, 290–296 (2017).
- 515 58. Asarnow, D., Palovcak, E. & Cheng, Y. UCSF pyem. (2021).
- 516 59. Pettersen, E. F. *et al.* UCSF Chimera--a visualization system for exploratory research and analysis. *J.*  
517 *Comput. Chem.* **25**, 1605–1612 (2004).
- 518 60. Zheng, S. Q. *et al.* MotionCor2: anisotropic correction of beam-induced motion for improved cryo-  
519 electron microscopy. *Nat. Methods* **14**, 331–332 (2017).
- 520 61. Zhang, K. Gctf: Real-time CTF determination and correction. *J. Struct. Biol.* **193**, 1–12 (2016).
- 521 62. Zhang, K., and Sun, F. Gautomatch: an efficient and convenient gpu-based automatic particle selection  
522 program. <https://www2.mrc-lmb.cam.ac.uk/download/gautomatch-056>. (2011).
- 523 63. Liebschner, D. *et al.* Macromolecular structure determination using X-rays, neutrons and electrons: recent  
524 developments in it Phenix. *Acta Crystallogr. Sect. D* **75**, 861–877 (2019).
- 525 64. Kucukelbir, A., Sigworth, F. J. & Tagare, H. D. Quantifying the local resolution of cryo-EM density  
526 maps. *Nat. Methods* **11**, 63–65 (2014).
- 527 65. Emsley, P., Lohkamp, B., Scott, W. G. & Cowtan, K. Features and development of Coot. *Acta*  
528 *Crystallogr. Sect. D* . **66**, 486–501 (2010).
- 529 66. Gabler, F. *et al.* Protein sequence analysis using the MPI bioinformatics toolkit. *Curr. Protoc.*  
530 *Bioinforma.* **72**, e108 (2020).
- 531 67. Barad, B. A. *et al.* EMRinger: Side chain-directed model and map validation for 3D cryo-electron  
532 microscopy. *Nat. Methods* **12**, 943–946 (2015).
- 533 68. Pettersen, E. F. *et al.* UCSF ChimeraX: Structure visualization for researchers, educators, and developers.  
534 *Protein Sci. A Publ. Protein Soc.* **30**, 70–82 (2021).
- 535 69. Bi, G. *et al.* The ZAR1 resistosome is a calcium-permeable channel triggering plant immune signaling.  
536 *Cell* **184**, 3358–3360 (2021).
- 537

## 538 **METHODS**

### 539 **Bioinformatics analysis of ALMT proteins**

540 Sequences related to QUAC1/ALMTs were searched and analyzed by using PSI-BLAST<sup>52</sup>.  
541 Searches at  $E < 5 \times 10^{-3}$  starting with thirteen individual *Arabidopsis* ALMTs identified a  
542 common pool of over 1,700 plant ALMT-related protein sequences, which were pooled  
543 together and used for sub-classification into families and subfamilies. Detailed information is  
544 reported in the footnotes to the Extended Data Table 1.

545

### 546 **Cloning and expression of QUAC1/ALMT12 in yeast *S. pombe***

547 Full-length coding sequences of six plant QUAC1s from rice, wheat, corn, soybean, tomato and  
548 cotton, were cloned into a modified pREP1 vector with a C-terminal 10× His tag. The resulting  
549 constructs were transformed into a leucine auxotrophic *S. pombe* strain, and the transformants  
550 were selected on the standard EMM plates without leucine, as previously described<sup>53</sup>. To  
551 prevent protein expression during strain growth, 25 μM thiamine was added to inhibit the  
552 promoter.

553

### 554 **Scaled-up production and purification of *Gm*QUAC1**

555 To prepare the seed, transformed cells were inoculated into 100 ml EMM culture medium  
556 supplemented with 25 μM thiamine and were shaken at 200 rpm and 30°C for 24 hr. For protein  
557 expression and scaled-up production, the seed cells were collected by centrifugation and  
558 washed with sterile water twice before inoculation to a culture of 500 ml. After 12 hr growth,  
559 500 ml of fresh medium was supplemented, and the culture continued to grow for an additional  
560 24 hr. Cells were harvested through centrifugation for 20 min at 4,500 rpm.

561 For protein purification, cells were re-suspended in lysis buffer (50 mM Tris-HCl pH 8.0,  
562 200 mM NaCl, 2.5% glycerol, 1 μg/ml aprotinin, 1 μg/ml leupeptin, 1 μg/ml pepstatin, 2 mM  
563 PMSF and 2 mM DTT) and lysed using a high-pressure cell disrupter (JNBIO) with 4 passes  
564 at ~18,000 psi. Cell debris was removed by centrifugation at 12,000 rpm for 15 min, and the  
565 supernatant was subjected to a further ultra-centrifugation at 41,000 rpm for 1 hr. The

566 membrane was collected and homogenized in a solubilization buffer (50 mM Tris-HCl pH 8.0,  
567 200 mM NaCl and 2.5% glycerol) and incubated with a final concentration of 1.0% DDM and  
568 0.02% CHS by gentle stirring for 1 hr at 4°C. After ultra-centrifugation at 35,000 rpm for 50  
569 min, the resulting supernatant was purified by Ni<sup>2+</sup>-affinity column pre-equilibrated with the  
570 same solubilization buffer supplemented with 0.05% DDM and 2 mM TCEP. After 20 columns  
571 volume of buffer wash, the protein was eluted with 350 mM imidazole in the solubilization  
572 buffer. The resulting *GmQUAC1* protein, without removal of His-tag, was concentrated to ~10  
573 mg/ml and loaded onto a Superose6 (10/300) gel-filtration column for further purification and  
574 detergent exchange. The gel-filtration buffer contained 20 mM Tris, 150 mM NaCl (pH 8.0,  
575 adjusted with HCl) or 75 mM L-malate (pH 8.0, adjusted with NaOH), and 0.005% LMNG.  
576 The elution fractions were analyzed by SDS-PAGE, and the peak fractions were collected and  
577 concentrated for functional analysis (~2 mg/ml) or making cryo-EM grids (~5 mg/ml).

578

#### 579 **Cryo-EM grid preparation and data acquisition**

580 4 µl of *GmQUAC1*<sup>malate</sup> proteins (purified in 75 mM L-malate) were applied to newly glow-  
581 discharged holy carbon film grids (Au R1.2/1.3, 300 meshes, Quantifoil, Germany). The grids  
582 were blotted with force 3 and blotting time of 9.0 s at 100% humidity and 4°C and were vitrified  
583 by plunge freezing into liquid ethane using Vitrobot Mark IV (Thermo Fisher Scientific, USA).  
584 All movies were collected on a Titan Krios G2 transmission electron microscope (Thermo  
585 Fisher Scientific, USA) operated at 300 KV, equipped with a Gatan K2 Summit direct detection  
586 camera (Gatan Company, USA) and a post-column GIF energy filter.

587 Data collection was performed on EF-TEM mode with a slit width of 20 e<sup>-</sup>·V. The  
588 magnification was set to a nominal 130,000x, corresponding to a calibrated pixel size of 1.04  
589 Å/pixel at the specimen level (0.52 Å/pixel in super-resolution mode). Images were recorded  
590 using SerialEM (version 3.8.4)<sup>54</sup> with a beam-image shift method<sup>55</sup>. During the 8s exposure,  
591 32 frames were collected with a dose of around 60 e<sup>-</sup>/Å<sup>2</sup>. A total of 6,189 movie stacks were  
592 collected, with defocus ranging from -1.2 µm to -2.2 µm.

593

## 594 **Image processing and model building**

595 For cryo-EM image processing, all main steps were performed using RELION 3.0<sup>56</sup> or  
596 cryoSPARC 3.1<sup>57</sup>. Pyem<sup>58</sup> and UCSF Chimera<sup>59</sup> were used for format conversion of data files  
597 and reconstructions analysis, respectively.

598 In brief, 6,189 movie stacks were aligned by  $5 \times 5$  patches with dose weighting and binned  
599 to 1.04 Å using Motioncor2<sup>60</sup>. The contrast transfer function parameters were estimated using  
600 GCTF<sup>61</sup>. Micrographs with defects in the thon rings were discarded. 2,987,283 candidate  
601 particles were initially picked using Gautomatch without template<sup>62</sup>, and followed by several  
602 rounds of 2D classification in cryoSPARC, giving a set of 2,136,754 high-quality particles. A  
603 rough initial model was generated by a subset of 100,000 particles. Subsequently, six rounds  
604 of 3D classification were performed at C1 symmetry. Three parallel 3D classifications were  
605 performed within each round, and the resulting good particles were combined for sequential  
606 round classification. After that, a set of 428,433 particles that generated a map of 4.0 Å using  
607 NU-Refinement in cryoSPARC were subjected to Bayesian polishing. Three rounds of 3D  
608 classification were further performed as described below. Each round contains an NU-  
609 Refinement at C2 symmetry in cryoSPARC followed by an alignment-free 3D classification  
610 with a micelle-free mask in Relion. Finally, NU-refinement of 169,576 particles yielded a  
611 reconstruction with a resolution of 3.5 Å, based on the gold-standard Fourier Shell Correlation  
612 (FSC) using the 0.143 criterion. Density modification was performed using PHENIX<sup>63</sup>. Local  
613 resolution was determined using ResMap<sup>64</sup>.

614 *A de novo* atomic model was built manually in Coot<sup>65</sup> using the predicted secondary  
615 structure from MPI quick2d<sup>66</sup>. The model was further refined using PHENIX<sup>63</sup>. The final  
616 model was validated using EMRinger<sup>67</sup>. All structure figures were prepared in UCSF  
617 ChimeraX<sup>68</sup>.

618

## 619 **The two-electrode voltage-clamp recordings**

620 The TEVC recordings were conducted as previously described<sup>20</sup>. In brief, all cDNAs for  
621 *GmQUAC1*, including wild-type or mutants, were cloned into plasmid pGHME2 for expression

622 in *Xenopus laevis* oocyte. Linearised plasmids were used to generate cRNAs using T7  
623 polymerase. 36 nanograms of cRNA of each construct were injected into isolated oocytes.  
624 Oocytes were then incubated at 18°C for ~48 hr in ND96 buffer (96 mM NaCl, 1.8 mM CaCl<sub>2</sub>,  
625 1 mM MgCl<sub>2</sub>, 2 mM KCl, 5 mM HEPES-Na, pH 7.5).

626 Using a Oocyte Clamp OC-725C amplifier (Warner Instruments) and a Digidata 1550 B  
627 low-noise data acquisition system with pClamp software (Molecular Devices), TEVC  
628 recordings were performed in the bath solutions: 10 mM MES/Tris pH 5.6, 1mM  
629 Ca(gluconate)<sub>2</sub>, 1 mM Mg(gluconate)<sub>2</sub>, 70 mM Na(gluconate), 1 mM LaCl<sub>3</sub>, 30 mM NaCl or  
630 NaNO<sub>3</sub>, or 30 mM L-malate (pH 5.6, prepared from L-malic acid with NaOH). Osmolarity was  
631 adjusted to ~220 mOsmol\*kg<sup>-1</sup> with D-Sorbitol. The microelectrode solutions contained 3 M  
632 KCl, and the bath electrode was a 3 M KCl agar bridge. Voltage-clamp currents were measured  
633 in response to 200 ms-long voltage steps to test potentials that ranged from +60 mV to -180  
634 mV in 20 mV decrement. Prior to each voltage step, the membrane was held at +60 mV for 50  
635 ms, and following each voltage step, the membrane was returned to -180 mV for 50 ms. I-V  
636 relations for *GmQUAC1* channels were generated from currents measured at 5 ms after the  
637 beginning (Instantaneous currents,  $I_{inst}$ ) or before the end (Steady-state currents,  $I_{ss}$ ) of each test  
638 voltage step. Three independent batches of oocytes were investigated and showed consistent  
639 findings. Data from one representative oocyte batch were shown. The recordings were analyzed  
640 using Clampfit 10.6 (Molecular Devices) and Prism (ver. 5.0, GraphPad).

641

#### 642 **The planar lipid bilayer recordings**

643 Lipid bilayer experiments were conducted as previously described in our study of the ZAR1  
644 channel<sup>69</sup>. The purified *GmQUAC1* (in 150 mM NaCl or 75 mM L-malate), at a concentration  
645 of 1.5~2.5 µg/ml, was fused into planar lipid bilayers formed by painting a lipid mixture of  
646 phosphatidylethanolamine (DOPE) and phosphatidylcholine (DOPC) (Avanti Polar Lipids) in  
647 a 5:3 ratio in decane across a 200 µm hole in a polystyrene partition separating the internal and  
648 external solutions in polysulfonate cups (Warner Instruments). The *trans* chamber (1.0 ml),  
649 representing the extracellular compartment, was connected to the head stage input of a bilayer



650 voltage-clamp amplifier. The *cis* chamber (1.0 ml), representing the cytoplasmic compartment,  
651 was held at virtual ground. Solutions used for I-V relationship analysis were as follows: 150  
652 mM NaCl or 150 mM NaNO<sub>3</sub>. All solutions were buffered with 20 mM Tris (pH 8.0). Purified  
653 proteins were added to the *cis* side and fused with the lipid bilayer.

654 Currents were recorded every 1~2 min after application of the voltage to the *trans* side.  
655 Single-channel currents were recorded using a Bilayer Clamp BC-525D (Warner Instruments),  
656 filtered at 800 Hz using a Low-Pass Bessel Filter 8 Pole (Warner Instruments) and digitized at  
657 4 kHz. All experiments were performed at room temperature (23 ± 2°C). The recordings were  
658 analyzed using Clampfit 10.6 (Molecular Devices) and Prism (ver. 5.0, GraphPad).

659

### 660 **Biochemical characterization of CHD of *GmQUAC1***

661 cDNAs encoding the C-terminal cytoplasmic helical domain of *GmQUAC1* (wild-type or  
662 mutants) were subcloned into a modified bacterial expression vector pET-24a, with a C-  
663 terminal 10× His tag. Transformed *E. coli* BL21 (DE3) cells were grown in a TB medium  
664 containing Kanamycin (50 µg/ml). Protein expression was induced in cells grown to an optical  
665 density at OD<sub>600</sub> of ~0.8 with 0.4 mM isopropyl β-D-thiogalactoside (IPTG) and followed by  
666 overnight cell growth at 16°C. Cells were collected and subsequently lysed using a high-  
667 pressure cell disrupter (JNBIO) with 3 passes at ~15,000 psi. The target protein was purified  
668 by using Ni<sup>2+</sup> affinity chromatography and further analyzed by Superdex75 (10/300) gel  
669 filtration chromatography and SDS-PAGE.

670

### 671 **The three-dimensional structure modelling using AlphaFold2**

672 Briefly, the sequence for AlphaFold prediction was generated by two individual  
673 *GmQUAC1* sequences, connecting by a linker of tandemly repeated sequence of (GSGS)<sub>50</sub>.  
674 Running with the local installed AlphaFold2 program and the CASP14 preset and databases (as  
675 of July 23, 2021), five dimer models were generated, with their pLDDT (predicted IDDT-C<sub>α</sub>)  
676 scores ranging from 64.6 to 68.8. All the AlphaFold predicted structures (AF-structure) are  
677 nearly identical, with apparent two-fold symmetry. The two protomers in the top-rank dimer

678 model (scored 68.8) display an r.m.s.d of 0.92 Å, was selected for further structural comparison  
679 with the cryo-EM structure. For a better view, the disordered (residues 1-35, 394-454 and 507-  
680 537) regions were removed in the final model.

681

## 682 **QUANTIFICATION AND STATISTICAL ANALYSIS**

683 In all figure legends, n represents the number of independent biological replicates. All  
684 quantitative data were presented as mean ± SEM.

685

## 686 **DATA AND CODE AVAILABILITY**

687 All data are available in the manuscript or the supplementary material. The accession number  
688 for the 3D cryo-EM density map reported in this paper is XXX, and the Protein Data Bank  
689 (PDB) accession code for the coordinate is XXX.

690

## 691 **ADDITIONAL RESOURCES**

692 This study did not generate any additional resources.

693

# Figure 1

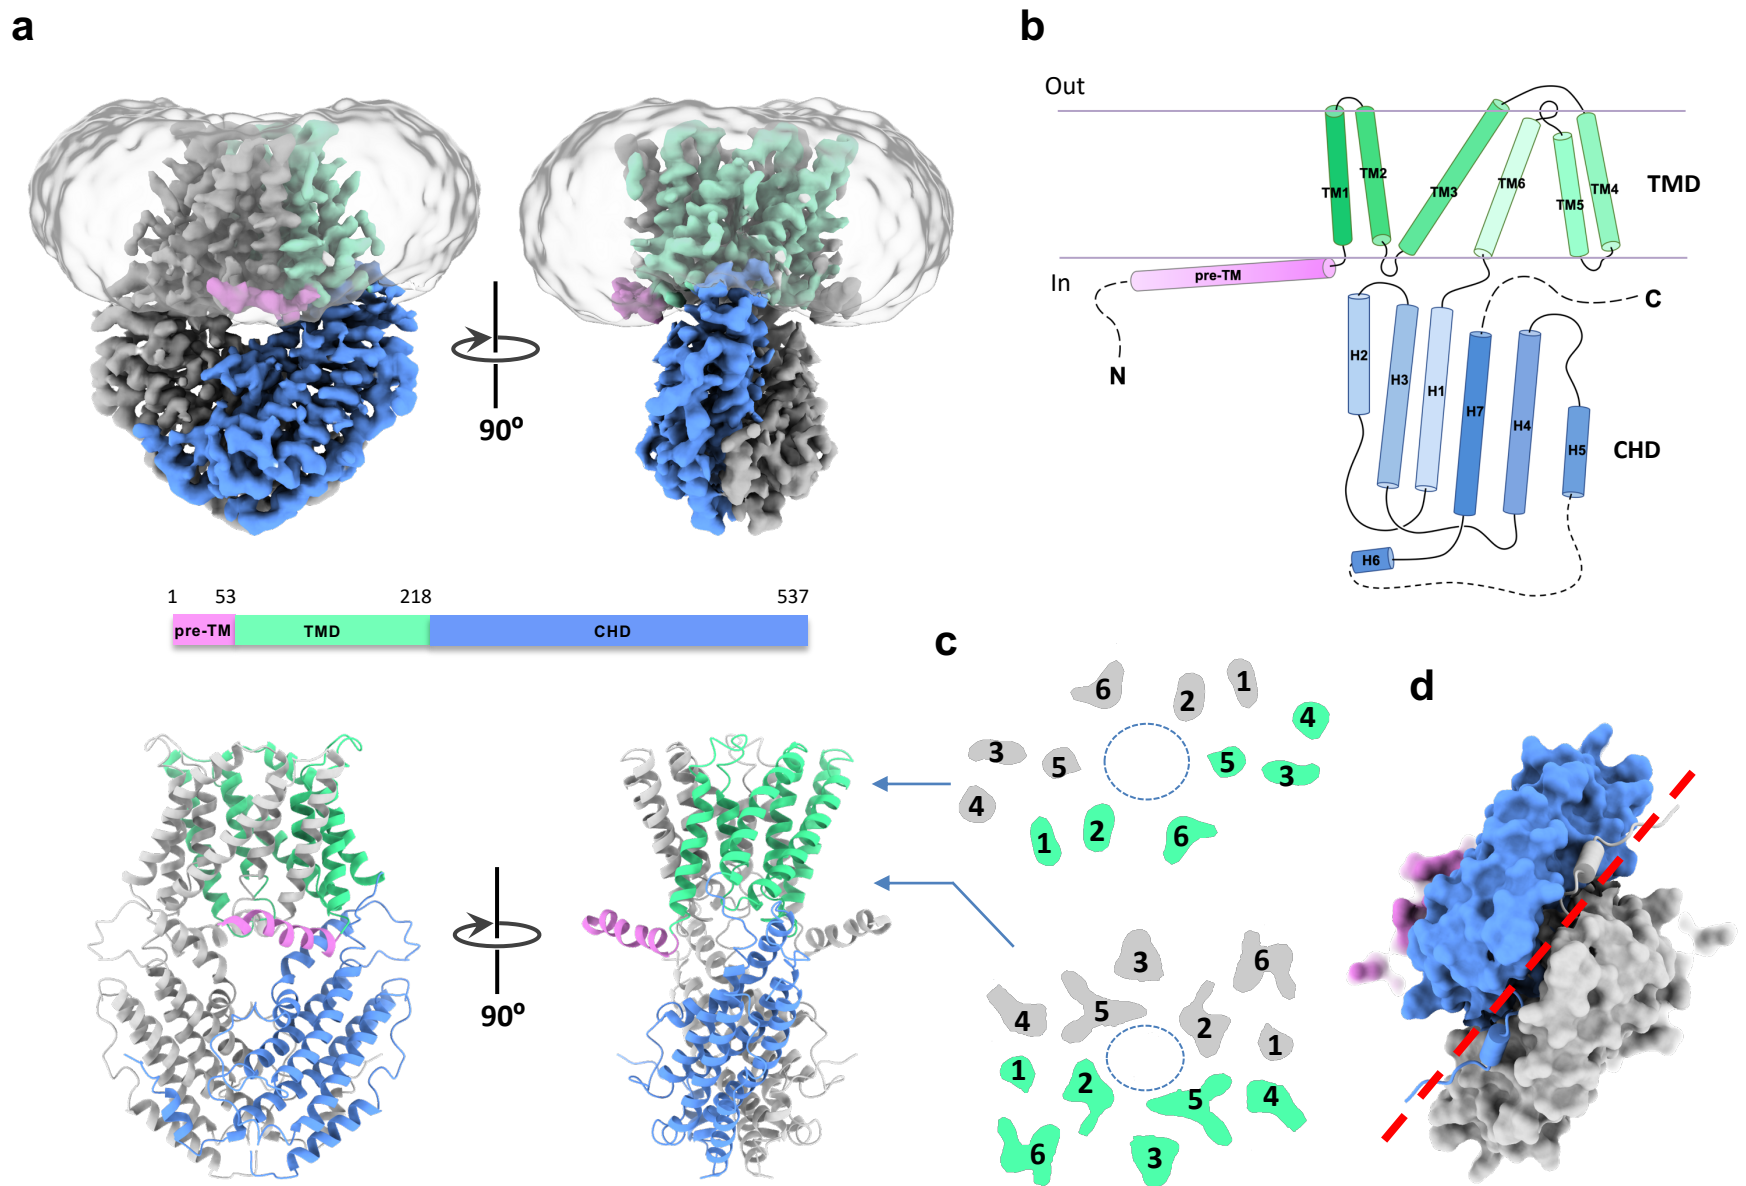

**Fig. 1 Architecture of the QUAC1 channel**

**a**, Overall structure of the *Gm*QUAC1 channel. The cryo-EM density maps (top) and ribbons drawings (bottom) are shown, with the pre-TM helix in pink, the transmembrane domain (TMD) in green and the cytoplasmic helical domain (CHD) in blue in one promoter. Another promoter is coloured in grey.

**b**, Topology of the *Gm*QUAC1 protomer. The six helices in TMD are marked by TM1-6, and the seven helices in CHD are marked as H1-7. The membrane boundary is shown as grey lines. The disordered regions are indicated as dashed lines.

**c**, Top view of the cross-section of the transmembrane layer at the indicated positions by the arrow lines in (**a**). The elliptical dashed line marks the pore, and the TMs are indicated.

**d**, Bottom view of the C-terminal dimeric domains, colored as in (**a**). The domain-swapped finger helix H6 is shown as cylinder cartoon, and a red dash line marks the dimeric interface of the CHD.

**Figure 2**

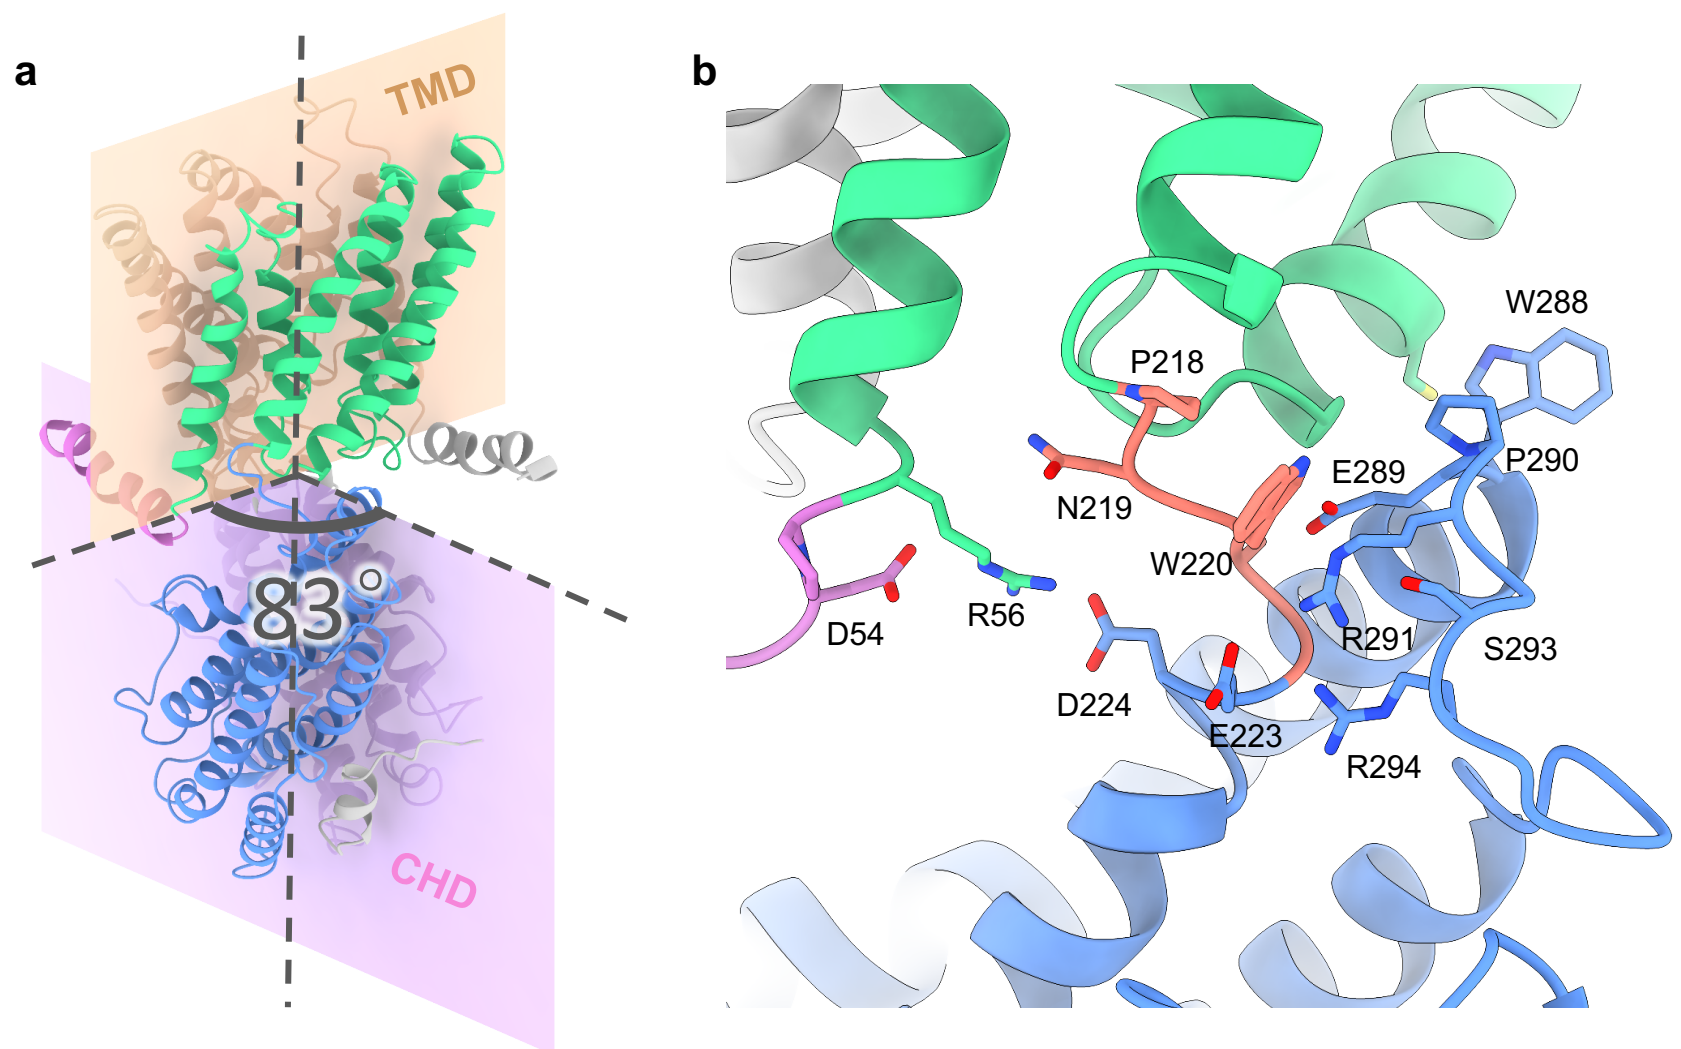

**Fig. 2 The twisted bi-layer architecture of the QUAC1 channel**

**a,** The dimeric interfaces of the TMD and CHD of the *Gm*QUAC1 channel. These dimeric interfaces are nearly perpendicular to each other, forming a dihedral angle of  $\sim 83^\circ$ . The ribbon model is colored as in Fig. 1a.

**b,** The layer interface between the TMD and CHD. The TMD portion connects to the CHD portion via a highly conserved PXWXXG motif (P218-N219-W220-S221-G222, in salmon), which is interact with another characteristic motif WEP (W288-E289-P290, located between helix H2 and H3, in blue). Other surrounding charged residues at the interface are also shown in sticks, including R56, R291, R294, D54, E223, D224 and E289. The ribbon model is colored as in (a).

# Figure 3

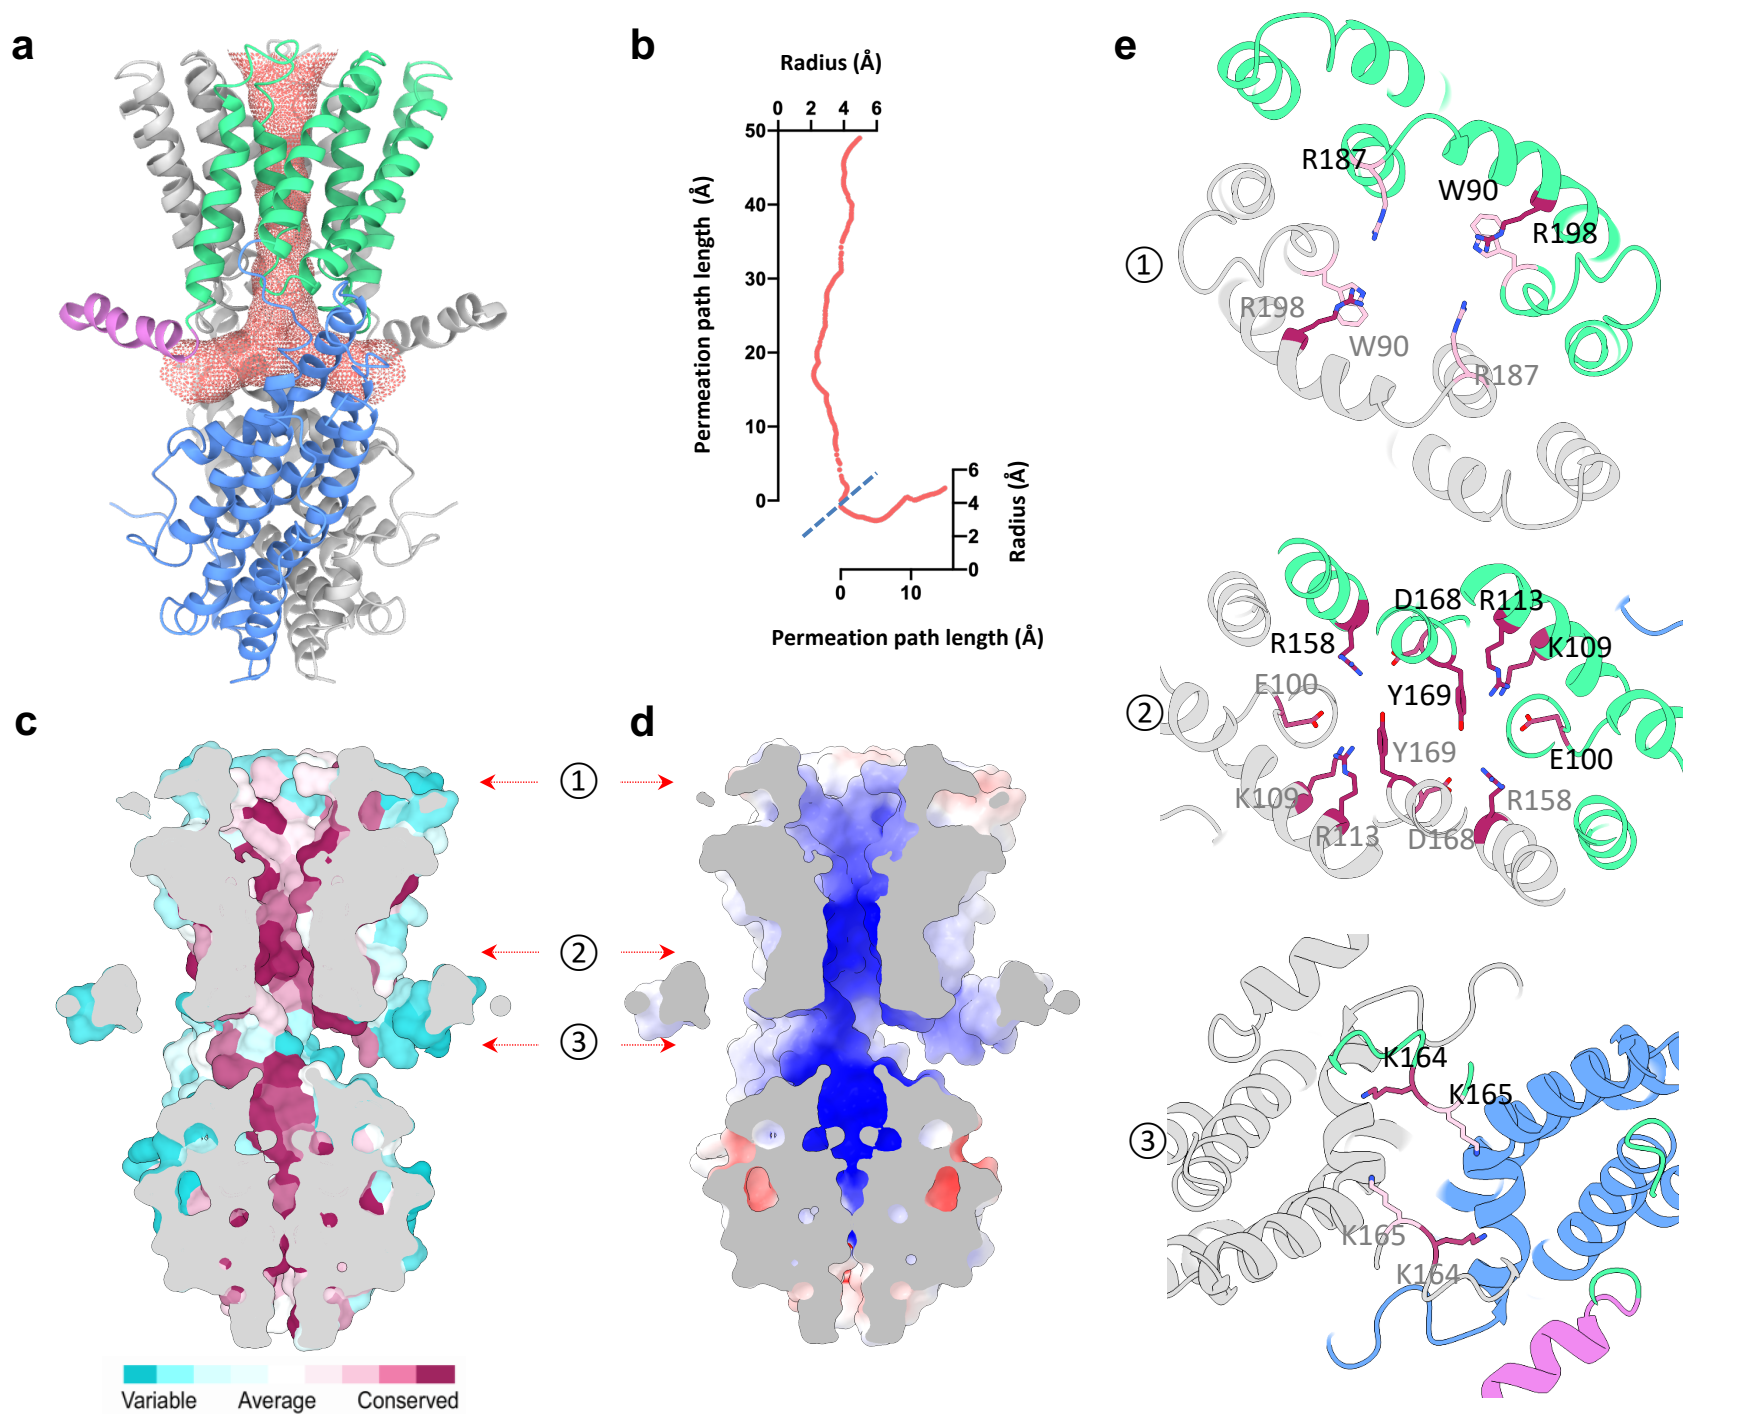

**Fig. 3 Structural feature of the QUAC1 channel pore**

**a**, The pore-lining surface was computed by the program HOLE and drawn into a ribbon model of the *Gm*QUAC1 pore. We used a simple van der Waals surface for the protein and the program default probe radius of 1.15 Å. The T-shaped pore is shown in salmon dots.

**b**, Plot of the pore radius as a function of the pore axis.

**c** and **d**, Side views of the cross-section through the ion-conducting pore. The molecular surface colored with sequence conservation for 137 non-redundant proteins of the QF2B subfamily is shown in **(c)** and the molecular surface colored with electrostatic potential is shown in **(d)**.

**e**, Top views of the cross-section through the ion-conducting pore at three indicated positions by the arrow in **(c)** and **(d)**. The ribbon is colored as in **(a)**. The conserved pore-lining charged residues are shown in sticks, coloured with the sequence conservation as in **(c)**.

# Figure 4

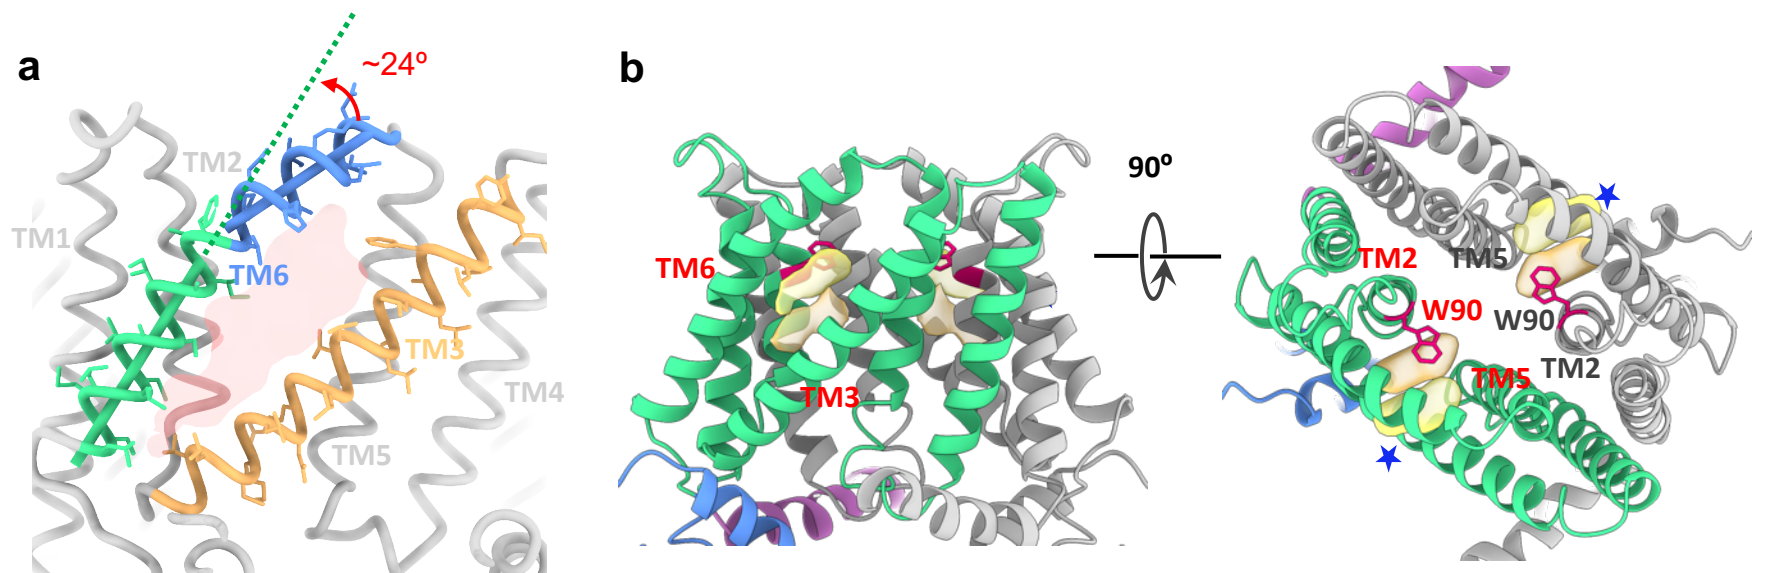

**Fig. 4 The lateral fenestration in the QUAC1 channel**

**a**, The lateral fenestration, with a dimension of  $\sim 6 \text{ \AA} \times 20 \text{ \AA}$ , is shown in transparent red, which is formed by TM2, TM3, TM5 and TM6 from one protomer. A kink ( $\sim 24^\circ$ ) in TM6 is indicated.

**b**, The unidentified densities (in yellow) within the fenestration (indicated by arrows). The side view (right) and top view (left) are shown. The W90 residues are shown as red sticks. The locations of fenestration are indicated with a blue stars in the top view.

# Figure 5

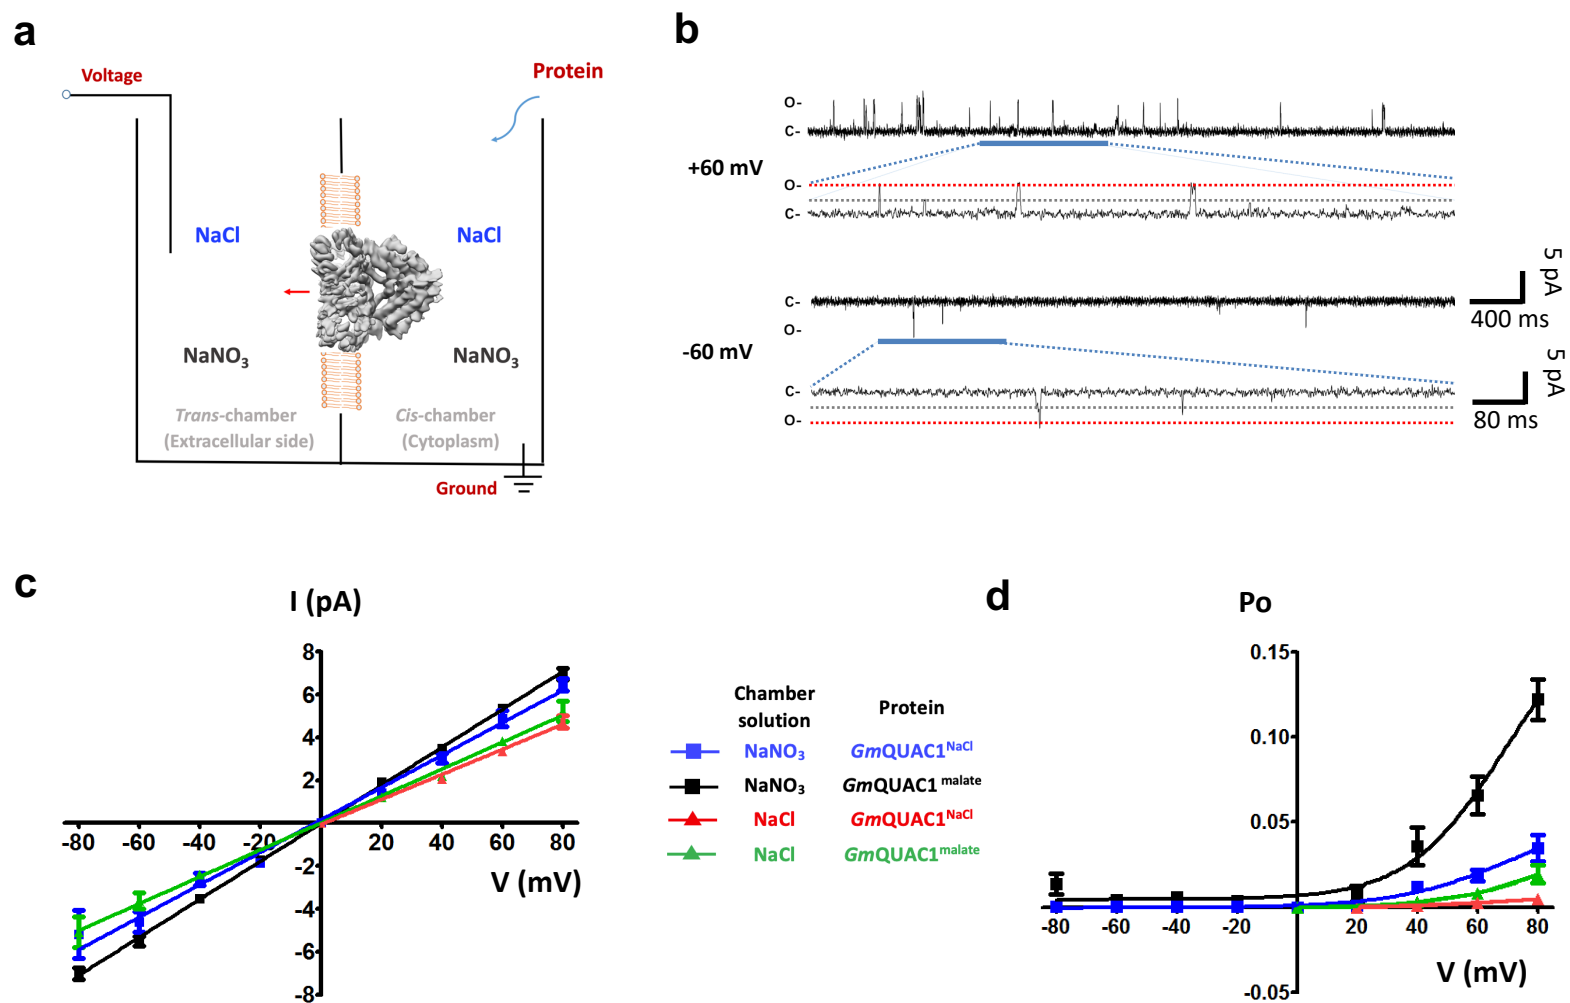

**Fig. 5 Single channel analysis of the QUAC1 channel in planar lipid bilayer**

**a**, The schematic illustration of single-channel recording of *GmQUAC1* channel in a planar lipid bilayer. The chambers were filled with 1.0 ml of symmetrical solutions of 150 mM NaCl or 150 mM NaNO<sub>3</sub>, and the *GmQUAC1*<sup>NaCl</sup> or *GmQUAC1*<sup>malate</sup> (purified in 150 mM NaCl or 75 mM L-malate, respectively) were added to the *cis*-side. The *trans*-chamber, representing the extracellular compartment, was connected to the head stage input of a bilayer voltage-clamp amplifier. The *cis*-chamber, representing the cytoplasmic compartment, was held at virtual ground.

**b**, Representative current traces for single channel analysis of *GmQUAC1*<sup>NaCl</sup> are shown at +60 mV or -60 mV holding potentials in the NaNO<sub>3</sub> solution. The closed (C) and full-open (O) states are indicated.

**c** and **d**, The current-voltage relationships (**c**) and open probabilities (**d**) for the single-channel recordings of *GmQUAC1*. The chamber solutions (NaNO<sub>3</sub> or NaCl) and protein (*GmQUAC1*<sup>NaCl</sup> or *GmQUAC1*<sup>malate</sup>) are indicated in the inset (Data are mean ± SEM, n ≥ 4).

# Figure 6

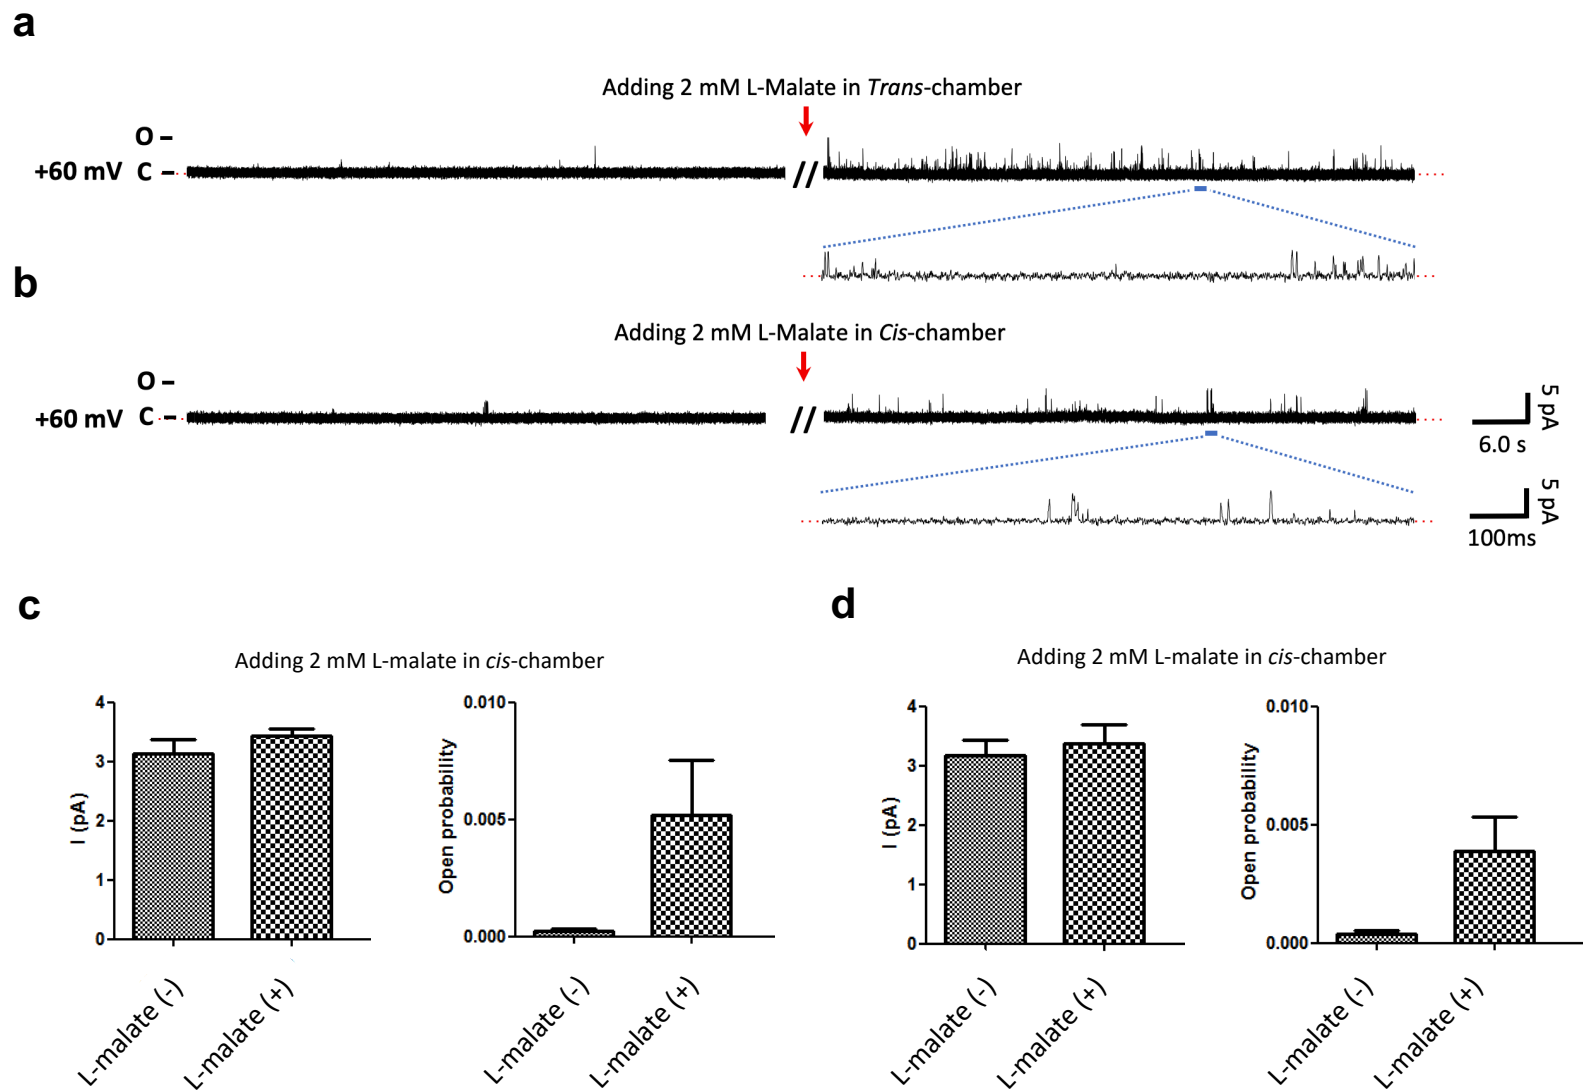

**Fig. 6 Single channel analysis of malate regulation on QUAC1**

**a** and **b**, The chambers were filled with symmetrical solutions of 150 mM NaCl, and the purified *Gm*QUAC1<sup>NaCl</sup> proteins were added to the *cis*-side. The representative current traces of 60 s at +60 mV, before and after adding 2 mM L-malate to the *trans*- (**a**) or *cis*- (**b**) chamber, are shown.

**c** and **d**, The regulation effect of malate on the *Gm*QUAC1<sup>NaCl</sup> in the NaCl solutions. The current amplitude (left) and open probability (right) analysis for the recordings, before (-) or after (+) addition of 2 mM L-malate to the *trans*- (**c**) or *cis*- (**d**) chamber (Data are mean  $\pm$  SEM, n=3 for each group).



**Figure 7**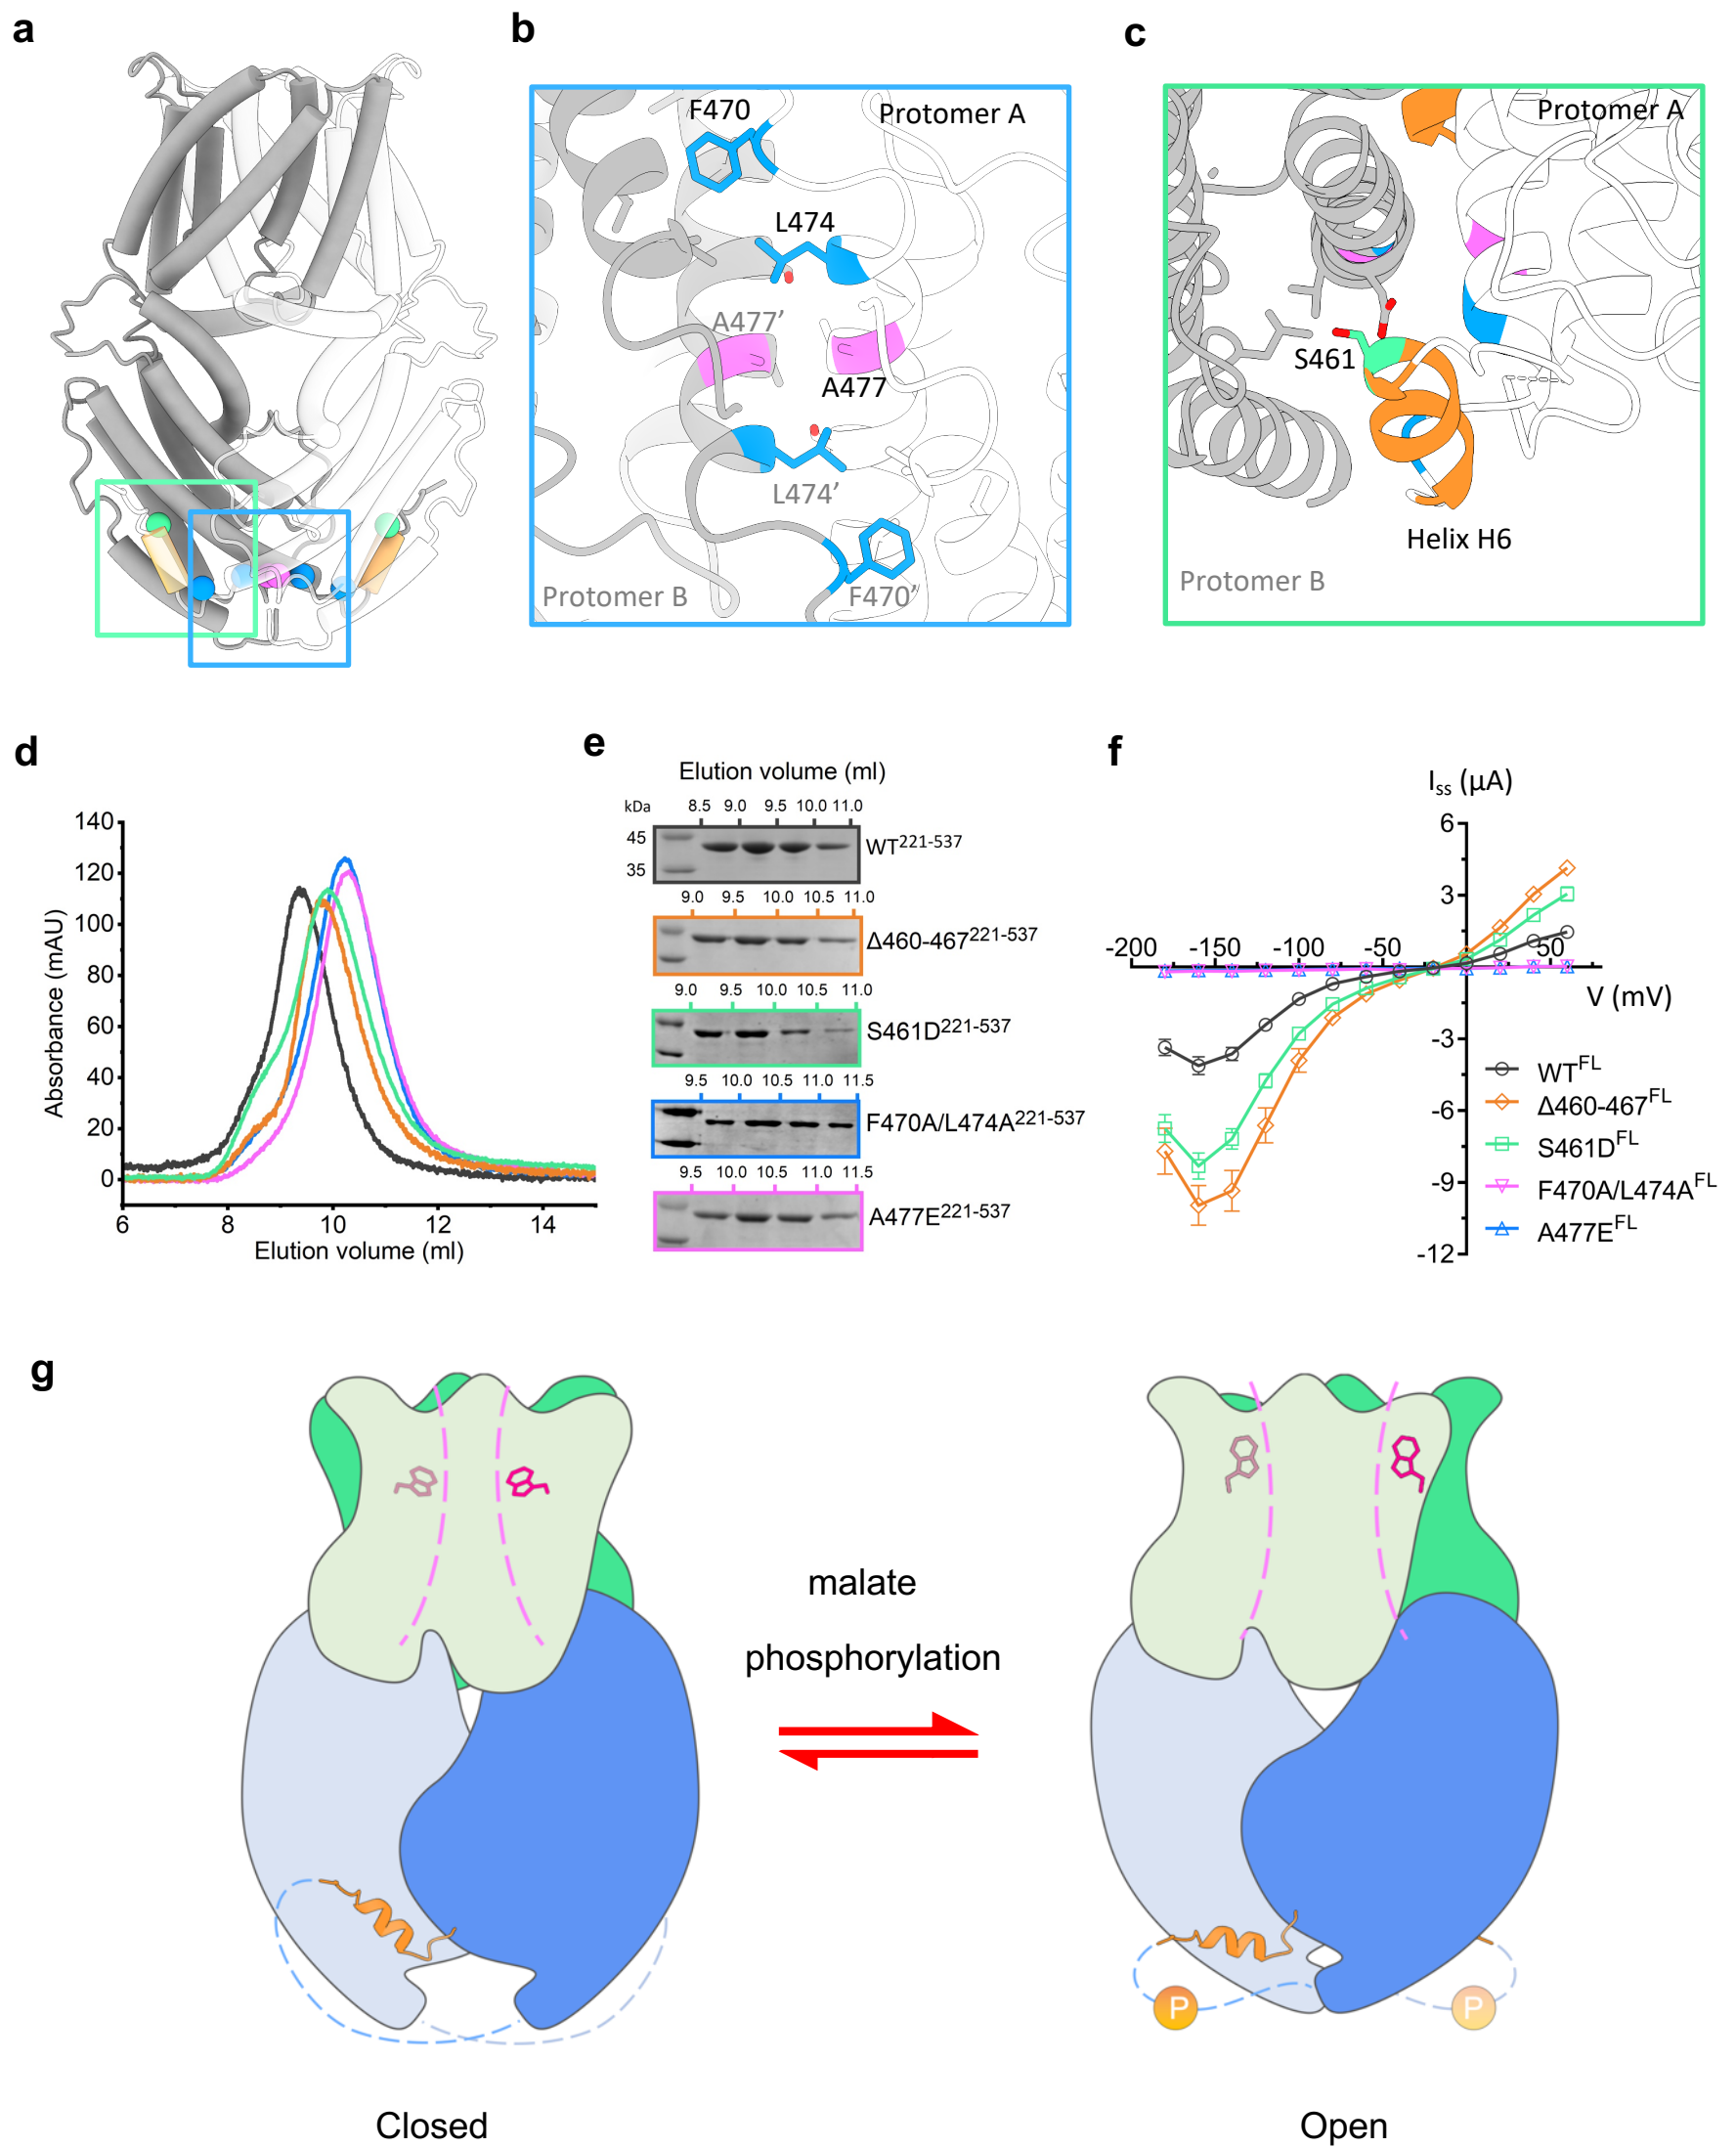**Fig. 7 Effect of dimeric interactions on channel activity and the proposed model for QUAC1 regulation**

**a**, The cartoon of the *Gm*QUAC1 channel is shown, with one protomer in grey and one in white. The domain-swapped helix (H6, residues 460-467) is colored in orange, and key residues at the dimeric interface are highlighted: S461 in green, A477 in magenta and F470/L474 in blue.

**b** and **c**, Close-up views of the cytoplasmic dimer interface. Residues at the dimeric interface are shown as sticks and colored as in (**a**).

**d** and **e**, The purification of the CHD proteins (residues 221-537, wild-type or mutants) on a Superdex75 (10/300) column. Compared to the wild-type (peak at ~9.2 ml), the eluted peaks for the dimer-disrupting mutants (A477E and F470A/L474A) shift backwards to ~10.2 ml, suggesting a disassociation of dimer into monomer. The elution peaks at ~9.7 ml for the two finger helix altered mutants ( $\Delta$ 460-467 and S461D) suggest loosened conformations upon the removal of finger helix interaction. The eluted fractions were also analyzed by SDS-PAGE, as shown in (**e**).

**f**, The TEVC recording of *Gm*QUAC1 channel (wild-type and mutants) in *Xenopus laevis* oocytes. The same set of mutations, as in (**d**), were generated into full-length constructs for conductance measurement in the bath solution of 30 mM L-malate (Data are mean  $\pm$  SEM,  $n \geq 8$ ).

**g**, Model for the QUAC1 channel regulation. Upon malate binding, the QUAC1 undergoes intramolecular domain reorganization to form a twisted bi-layer architecture, and subsequently induces the conformational change of the toggle switch W90. These changes promote the channel conversion from closed to open state. Other modulations, such as phosphorylation or calmodulin binding, can further enhance the malate-mediated activation, probably via the release of its inhibitory domain-swapped helix from the inter-protomer interaction.
